# Supplementary material
Source: PubMed Central journal article supplement (PMC3538252)
Supplement: 1213841110_pnas.201213841SI.pdf [file 1213841110_pnas.201213841SI.pdf]

# Supporting Information

Allan et al. 10.1073/pnas.1213841110

## SI Materials and Methods

**Stressor List and Weightings.** We use the term “stressor” to refer to a physical, chemical, or biological factor that potentially has adverse effects on ecosystem condition. We focus on stress rather than condition per se because the quantitative conversion of stressor levels into specific impacts on condition is difficult to achieve at the ecosystem level. However, previous comparisons of multivariate stress scores to ecosystem condition in the world’s oceans (1) and Great Lakes watersheds (2) suggest that the types of human modification included in this study do indeed translate into real-world impacts.

During a series of expert workshops, we developed a list of 50 anthropogenic stressors affecting the Great Lakes (Table S1). Criteria guiding stressor selection were: (i) stressors result in some alteration of the biology, chemistry or physical structure of the Great Lakes ecosystem and its catchment, (ii) stressors represent a distinct mechanism of impact, and (iii) stressors had potential availability of spatial data encompassing all five lakes. We excluded stressors with incomplete coverage because this could bias basin-wide spatial comparisons. Sufficient data were available to create basin-wide maps for 34 stressors. We group the stressors into seven higher-level categories: aquatic habitat alteration, climate change, coastal development, fisheries, invasive species, nonpoint pollution, and toxic chemicals. We did not include municipal water withdrawals because quantitative spatial data are not available. Detailed methods are provided for individual stressors in *Environmental Stressors*, below, and spatial data sources are documented in Table S2.

We used an expert survey modeled after a published example from marine ecosystems (3) to derive weightings that reflect relative risk of ecological impact. The survey assessed the vulnerability of each lake and habitat type to each stressor on the basis of five components of ecosystem impact. We received responses on the ecosystem ratings portion of the survey from a total of 161 Great Lakes researchers and natural resource managers. The survey results were used to derive a single integrative weight for each stressor on a 0–1 scale based on accepted decision science methodologies (3). These quantitative weightings (pooled weights in Table S1) enabled us to account for disparities in the ecological impact of different stressors in different habitats of different lakes. For example, the expert consensus was that high levels of certain invasive species can generate over twice as much stress as high levels of coastal recreation in the near-shore zone of Lake Michigan. Thus, these weightings allow cumulative stress (CS) to be calculated in an additive way by converting heterogeneous stressor intensity values into a common currency of expected impact on ecosystems. Survey respondents rated each stressor independently of other stressors; we did not attempt to account for interactions among stressors or nonlinear impacts of stressor intensity. Our survey yielded a synthesis of expert opinion about the relative impact of different stressors.

Our survey required respondents to consider each stressor independently of others, which may lead to imperfect rankings; nonetheless, equal weighting of stressors is clearly incorrect, and the methods we used have been validated elsewhere (3). In addition, sensitivity analyses show our results are robust to such potential differences.

**Data Representation and Projection.** All data, regardless of native resolution, were mapped to a common resolution of 1-by-1 km using a grid imposed within a modified Albers Equal-Area coordinate system. The customized coordinate system has param-

eters defined based on the extent of the watersheds of the Great Lakes (extents: N: 50.738281° N; S: 40.399673° N; W: 93.205208° W; E: 74.499374° W). Parameters for this coordinate system are: Central Meridian 84.455955° W; Parallel 1 42.122774° N; Parallel 2 49.015180° N; Latitude of Origin 45.568977° N; False Easting 1,000,000 m; and False Northing 1,000,000 m.

**Stressor Mapping.** All stressors were mapped across the five Great Lakes, excluding connecting waters (St. Mary’s River, St. Clair River, Lake St. Clair, Detroit River, Niagara River), and terminating at the St. Lawrence River outlet of Lake Ontario. Datasets used to generate individual maps differed in their native resolution, and we used standard geospatial methods for resampling and interpolation to convert them to a common grid (Table S2). We selected a 1-km<sup>2</sup> grid cell to adequately represent near-shore contours and bathymetric features of the lakes, resulting in 243,937 pixels. When original dataset extents did not align with our template because of boundary inconsistencies, small gaps with no data values near the shoreline were filled in with interpolated data values for continuous data or nearest-neighbor values for categorical data. Specific data transformations are described in sections that document individual stressors; here we provide a brief summary. For stressor datasets with a native scale coarser than 1 km<sup>2</sup>, the value from the original dataset was assigned to each receiving cell, distributing the value equally across the full area within the original cells. Examples include fish stocking, commercial fish harvest, summer warming, and ice cover. Five data layers were interpolated from point data observed at coarser scales using standard methods of geospatial statistics, specifically kriging. This process includes dissolved oxygen (for hypoxia), dreissenid mussels, and the three toxic data layers, each of which was represented by an extensive sampling grid. The remaining stressor datasets were at the kilometer or subkilometer scale.

For stressors whose influence extends beyond their point of origin (e.g., sediment loads entering a lake from a river mouth, shoreline modification affecting the near-shore zone), we modeled the spatial extent and used the modeled stressor levels for all subsequent calculations. For several stressors associated with onshore development (e.g., road density, shoreline hardening) we conservatively assigned the value of a shore pixel to the adjacent water pixel, assuming that intensity of influence would be negligible beyond 1 km. For other stressors we assumed a greater dispersal distance represented by a 2D exponential decay function. Coefficients were selected to represent the distance at which the intensity of a stressor’s influence was expected to decay to 10% of initial value, where it would be difficult to distinguish stressor influence from background. That distance was 2–5 km for most coastal stressors (e.g., contaminants associated with sewer outfalls, mining, power plants, marina activities, commercial ports). Model coefficients were chosen based on published studies of distance effects (e.g., near-shore mine waste distribution) or other evidence of distance of impact (e.g., length of power plant water intake pipes) or by pairing with a better evidenced stressor likely to have similar effects. River-exported sediments and nutrients were expected to disperse to greater distance (decay to 10% of initial value in 10–15 km) as evidenced by satellite imagery of river plumes and limited lake survey data. Stocked fish and young sea lampreys emerging from natal streams were assigned greater dispersal distances (50–150 km) based on literature reports and expert judgment. For some human activities (recreational boating, charter fishing) we con-

sulted marina managers and charter captains for estimates of distance traveled. Further explanation of decay distance is provided with each stressor description.

Dispersal modeled as 2D exponential decay results in successive concentric rings and undoubtedly fails to take into account complexities of currents and mixing, fish dispersal, and human behavior. We acknowledge this limitation, but it was infeasible to develop more comprehensive models for all stressors across all lakes; in addition, data to validate more detailed models are largely lacking. Further investigation of the influence of materials and activities extending from land to near-shore and then to offshore across a range of environmental conditions is an urgent need.

The final step in our standardization of stressor maps was to express every stressor variable on a uniform numeric scale. Before transformation, distributions of each stressor differed, but most were skewed to the right or zero inflated. Following Halpern et al. (1), values in each cell were  $\ln[x + 1]$ -transformed, then rescaled from 0 (zero or minimum observed value) to 1 (maximum observed value) (using max-min rescaling:  $[x_i - x_{\min}]/[x_{\max} - x_{\min}]$ ). This continuous, unitless scale allows direct comparison of stressors whose native units vary widely.

**Sensitivity Tests of Calculation Methods.** Our analysis required a variety of decisions about computational procedures, each of which could have influenced our conclusions. To verify that our analyses were robust to alternative procedures, stressor weightings, and data availability, we tested the sensitivity of our results to permutations of each type. Our interpretation of these sensitivity tests focused on the robustness of spatial patterns in the CS index, because those patterns are the basis for our key inferences. However, all sensitivity tests were executed at the pixel scale, thereby elucidating responses to computational permutations at both the basin-wide and pixel-specific spatial scales across the Great Lakes.

**Sensitivity to data standardization.** Our CS calculations required merging stressors, the native units of which vary widely. Rescaling the pixel values of each individual stressor to a 0–1 range served this purpose by creating a unitless, relative metric of the intensity of a given stressor at a particular location. Similarly, rescaling our CS index to a 0–1 range facilitated interpretation by creating an intuitive range of values. Therefore, for both individual stressors and the CS index, we considered three types of transformations to accomplish the 0–1 standardization. First, we used a basic max-min linear rescaling  $([x_i - x_{\min}]/[x_{\max} - x_{\min}])$ . Second, we used a natural-log transformation  $(\ln[x + 1])$  before max-min rescaling, thereby compressing the upper end and expanding the lower end of the range. This process had the effect of minimizing the influence of extremely high values that could be spurious yet influential, and it is common practice in studies of ecological impact of stressors (1). Third, we used a cumulative distribution function (CDF) to replace each stressor or CS value with a score reflecting its percentile rank relative to all other pixels (4). The CDF approach resulted in a uniform number of pixels at any given level of stress, whereas the linear and log transformations allowed heterogeneity in the number of pixels at any given level of stress.

We applied all three transformation approaches separately to both the individual stressors and CS index. Each one yielded a range of scores from 0 (low stress) to 1 (high stress), and the spatial correlations were high among the resulting nine maps (based on all 36 pair-wise comparisons, Pearson's  $r$ : mean = 0.859, range 0.691–0.988). Thus, we conclude that our key inferences about spatial patterns of CS were independent of the normalization method for stressors and CS. For all analyses presented in the article, we used the natural-log transformation of stressor values followed by max-min linear rescaling of CS. This decision is in keeping with many previous studies on individual stressors, and using simple linear rescaling of the CS

index retained all quantitative spatial information about variation in CS. However, we used the CDF transformation of the CS index in two places for graphical purposes. To simplify interpretation of the overall CS map, we present the results in Fig. 1 using a CDF transformation of the CS index, because the flat frequency distribution of CS scores across pixels facilitates visualization of broad spatial patterns in our results. We also used the CDF-transformed CS index to display the relationship between the location of ecosystem services and CS (Fig. 3); using CDF-transformed values enabled us to use the 1:1 line in the plot as a straightforward null-expectation, reflecting services being distributed randomly with respect to CS (Fig. 4). Nonetheless, our sensitivity tests showed that both broad patterns and pixel-specific results were affected very little by the choice of transformation approach.

**Sensitivity to weightings.** Our CS index combined the spatial data on individual stressors with the relative weights of those stressors derived from our state-of-the-art survey of Great Lakes experts (Table S1). Although we adopted a robust approach to deriving these quantitative weightings (following ref. 3), it is important to assess how strongly they affected the overall patterns of CS reported. To test the sensitivity of our CS results to the weightings, we compared two alternative approaches to our expert-derived weightings. First, we set all weights to 0.0294, representing a null-weighting model where every stressor contributes equally to CS. Second, we randomly shuffled the expert-derived weights 10,000 times, and recalculated CS for each set of permuted weightings.

We found that spatial patterns of CS are robust to alternative weightings. Expert-derived and null (equal) weightings produced CS results that were highly correlated across the entire Great Lakes (Spearman rank correlation = 0.995) (Fig. S3A and B). To visualize the differences at a local scale, we quantified the difference in CS arising from null-weightings compared with our expert weightings. Minor differences were evident in some near-shore zones and in the paths of shipping lanes (which received a low stressor weight from Great Lakes experts) (Fig. S3C). However, no pixel exhibited a shift in pixel CS by more than 0.19 on the 0–1 scale, confirming that our analysis was robust at local scales as well as basin-wide. Similarly, CS from permuted weightings was closely correlated with CS from the original expert-derived weightings (Pearson's  $r$ : mean = 0.833, range 0.362–0.956,  $n = 10,000$  permutations) (Fig. S3D). These high correlations between results from expert-derived, null, and randomized weightings demonstrate that the weightings had only a modest influence on CS at any spatial scale.

**Sensitivity to stressor data inclusion.** Although we accounted for a more exhaustive set of stressors than most previous large-scale analyses of CS, it remains possible that our results could have been disproportionately influenced by spatial patterns in only a few stressors, or that accounting for an additional stressor could have changed the overall pattern. We tested these possibilities by quantifying the influence of individual stressors using a jackknife-style sensitivity test. For each of our 34 stressors in turn, we set its weighting to 0.0 and adjusted all other weightings proportionately upward so that the remaining 33 stressor weightings still summed to 1.0. CS was recalculated for each 33-stressor set, and the correlation between CS scores from the 34- and 33-stressor results was calculated across all pixels. At the pixel scale, we also evaluated the range of CS values that arose from exclusion of a single stressor.

We found that spatial patterns of CS were robust to exclusion of any single stressor. Results were strongly correlated in every case (Pearson's  $r$ : mean = 0.995, range 0.972–1.000) (Fig. S3E); therefore, no one stressor had substantial influence. Rather, the patterns of CS revealed by our analysis reflect broad patterns in the spatial distribution of many stressors. This result was also true at the scale of individual pixels; the maximum effect of

eliminating one stressor from the CS calculation was a change of 0.07 on the 0–1 scale. By extension, this sensitivity test indicates that our overall CS results would be unlikely to change if one or a few additional stressors were accounted for in the analysis as further data become available, even if these new stressors showed substantially different spatial patterns than any current stressor in our analysis.

**Conclusions from sensitivity tests.** Careful tests of the sensitivity of the CS index to shifts in data transformations, stressor weightings, and inclusion of specific stressors all indicate that our CS results were robust. At the basin-wide scale, there were strong spatial correlations between our original results and each permutation. These tests give us confidence that the spatial patterns of CS shown in Fig. 1 are robust. Thus, even if one or a few of our stressor maps were poor representations of actual spatial patterns, this would have negligible effects on the overall pattern of anthropogenic stress across the Great Lakes. Results would also have been comparable with alternative transformation approaches or stressor weightings.

At the local scale of interest to many managers and restoration ecologists, our CS index also proved robust. Although the emphasis of our analysis was large-scale patterns derived from high-resolution data, our sensitivity analyses were rooted in pixel-scale permutations. Altering the transformations, weightings, and stressor data used generally caused only small (usually <10%) changes in CS for individual pixels. Thus, the fine-scale patterns emerging from our CS analysis are reasonable representations of the available data on stressors across the Great Lakes. However, we caution against overinterpreting pixel-scale values as statements of current environmental quality at specific locations; that is not the intent of our analysis, and at present we are unable to validate our CS index against equally high-resolution field data on actual environmental quality.

## SI Ecosystem Units

**Habitat Categorization.** To allow comparisons across habitats, we developed a simple six-category classification based on bathymetry, substrate type, and the locations of wetlands and river mouths. Water depth was used to establish three zones: littoral (0–5 m), sublittoral (5–30 m), and offshore (>30 m). The 5-m contour separating the littoral and sublittoral is intended to account for differences in light penetration and influence of wave action. The thermocline maximum depth is ~25–30 m in late summer, functionally distinguishing near shore from offshore conditions. Because Lake Erie is shallower and has a distinct, three-basin structure, its depth zones were set at 0–3 m, 3–15 m, and >15 m. Substrate information was obtained from a variety of sources (5–14) and was integrated into a composite map. Initially, substrate was classified from native dataset categories into hard, sand, clay, and mud, and subsequently reclassified into hard vs. soft (sand, clay, and mud). Finally, because wetlands and river mouths are of particular importance, their presence or absence was used as a third characteristic. River mouths are the major conduit of land-based stressors into the lakes, pathways for potadromous fishes, and significant locations of human commerce and recreation. Wetlands are important as nursery ground for many taxa, and for nutrient cycling. We combined river mouths with wetlands to reduce the number of habitat categories needed for the expert survey to derive stressor weightings, and because many important wetlands within the Great Lakes occur naturally at river mouths. Each pixel was assigned to only one habitat type, such that a single habitat-specific weight was applicable to each stressor in a given pixel in the CS calculations.

The resulting habitat classification (Fig. S4) includes six categories: (i) wetland or river mouth, (ii) littoral-hard substrate, (iii) littoral-soft substrate, (iv) sublittoral-hard substrate, (v) sublittoral soft substrate, and (vi) offshore-pelagic. Gaps in data coverage for substrate forced us to add littoral-unknown sub-

strate and sublittoral-unknown substrate in some areas (3.6% of total lake area). For weighting stressors in these areas, we used the average of the weightings from hard and soft substrate classes in that depth zone.

## SI Environmental Stressors

Individual stressor maps may be found at [http://www.snre.umich.edu/gleam/allan\\_pnas\\_appendix2](http://www.snre.umich.edu/gleam/allan_pnas_appendix2). Data can be viewed at our project website, [www.greatlakesmapping.org](http://www.greatlakesmapping.org). Most data processing was done in ArcGIS (Esri).

**Category: Aquatic Habitat Alterations.** Aquatic habitat alterations were characterized with eight data layers, including hypoxia, light pollution, shipping lanes, ports, shoreline hardening, shoreline extensions, marinas, and tributary dams.

**Hypoxia.** Hypoxia, commonly defined as dissolved oxygen levels (DO) at or below the 2–4 mg·L<sup>-1</sup> range, occurs in the bottom layer (hypolimnion) of some highly productive regions of the Great Lakes. Hypoxia usually occurs during late summer because of the decomposition of organic matter leading to oxygen depletion. Human-induced nutrient enrichment, particularly from elevated phosphorus inputs, has increased the frequency and areal extent of hypoxia. Because DO > 4 mg·L<sup>-1</sup> is unlikely to be stressful to the majority of species (15), we estimated relative stress caused by hypoxia using the continuous range of DO values and a scale from 1 (no stress, >4 mg·L<sup>-1</sup>) to 0 (maximum stress, 0 mg·L<sup>-1</sup>). We mapped DO data for Lake Erie from September 2005 and Green Bay for September 2010. We also examined data for Saginaw Bay but found it did not meet our criteria for hypoxia. Point data were kriged to develop a continuous surface using ArcGIS algorithms with a neighborhood of five datapoints.

**Light pollution.** Light pollution because of human activity is especially pronounced in near-shore areas of high population density. Possible effects on aquatic organisms include disruption of fish foraging and reproductive behavior, and of vertical migration by zooplankton (a phenomenon in which zooplankton such as small crustaceans migrate to shallow waters by night to feed on algae and retreat to deeper waters during the day to avoid visually feeding fish). We extracted the data layer for light pollution (“Lights at Night”, 30 arc seconds resolution), from the National Oceanic and Atmospheric Administration (NOAA) National Geophysical Data Center (NGDC) Web site. The data were resampled to conform to the project 1-km<sup>2</sup> grid. The data file represents a cloud-free composite made with Defense Meteorological Satellite Program Operational Linescan System data. This data source shows a decline in light intensity with increasing distance from light sources and results in near-total light attenuation by about 45-km offshore.

**Industrial ports and harbors.** Industrial ports and harbors concentrate shipping and other industrial activities in river mouths and embayments, with associated increased risk of physical habitat disturbance and pollution. Shipping within the Great Lakes involves as much as 200 million tons of cargo at more than 100 ports; primary cargos include iron ore, coal, limestone, and grain (16). We mapped the average number of ship arrivals at Great Lakes ports from 2007 to 2009, using port locations provided by the Great Lakes Maritime Research Institute (17) and ship arrival data from Bailey et al. (18). The most highly visited ports in this analysis include Duluth-Superior (MN-WI), Detroit (MI), Hamilton (ON, Canada), Toledo (OH), and Cleveland (OH). Because the impacts of port and harbor locations likely are restricted to the port vicinity, we assumed their influence decayed to 10% of effect within 2.5 km and was negligible at 5 km.

**Shipping lanes.** Great Lakes ports and harbors are connected by a complex network of shipping lanes, locks, and navigation channels that allow ships to travel over 3,000 km from Duluth, MN, to the Atlantic Ocean. Environmental impacts associated with shipping

lanes include shoreline erosion from wave action caused by passing ships, substrate disturbance because of propeller wash in shallow areas, habitat degradation from ice-breaking and winter navigation, and pollution from ship discharges. We obtained shipping lanes data developed by the US Army Corps of Engineers (19), port locations from the Great Lakes Maritime Research Institute (17), and international shipping route data for 1996–2000 from Colautti et al. (20). To estimate traffic by route, we recorded the first, second, and third ports of call for each ship, and summed the number of ships traveling between each pair of ports. We used the network analyst tool in ArcGIS to identify 1,369 potential shipping routes between port pairs, of which 281 were used by the international ships in our dataset. We assumed ships traveled using the shortest route. The most-traveled routes by all international ships included the east-west routes through Lake Ontario and Lake Erie and the north-south route in western Lake Huron. The most common trips originated in Thunder Bay (ON, Canada), Duluth-Superior (MN-WI), and Hamilton (ON, Canada), and were bound for overseas ports. Great Lakes navigation routes correspond to nautical charts published by the Department of Commerce, NOAA, and the National Ocean Survey and recommended to commercial shippers operating in the Great Lakes (21). We added a 2.5-km buffer to each side of the shipping channel to account for variation in route fidelity, wake effects, and ship discharges.

**Tributary dams.** The installation and management of dams threatens the diversity of native Great Lakes fish by restricting or eliminating connectivity between the lakes and critical spawning, nursery, and overwintering habitats (22–24). Tributaries also provide water, nutrients, and sediment to the Great Lakes, particularly to coastal and near-shore ecosystems (25). Although limitation of fish passage and denial of fish access to the upper watershed are important consequences of dams, these influences are difficult to quantify and so the influence of tributary dams as a stressor is limited in this analysis to those effects associated with altered delivery of sediments, nutrients, and organic matter. Dam data for Ontario were acquired from the Ontario Ministry of Natural Resources (OMNR). US dam data were derived from the National Anthropogenic Barrier Dataset developed through a project sponsored by the US Fish and Wildlife Service. At least 12,000 dams occur throughout Great Lakes basin; of these, ~3,400 are considered “large” (>2 m in height), including 1,910 in Canada and 1,452 in the United States. This reduced list of dams >2 m is considered most likely to influence nutrient and sediment regimes via impoundments. The influence of watershed dams as a stressor was estimated using river tributaries as pour points, and the magnitude of the influence at the pour point was scaled to the count of dams per watershed. The influence of dams was then propagated into the Lakes assuming their influence decayed to 10% of effect within 15 km and became negligible at 30 km, identical to nitrogen and phosphorus propagation.

**Shoreline hardening.** Hardened shoreline has the potential to alter near shore sediment dynamics and accelerate lakebed erosion (26, 27). Shoreline hardening may facilitate establishment of lithophilic nuisance species like zebra and quagga mussels, and thus possibly aid the expansion of nuisance species throughout the Lakes (28). Lake Erie and its connecting waters have a very high extent of hardening, Lakes Michigan and Ontario are intermediate, and Lakes Huron and Superior have little shoreline hardening (29). Data for the United States and Canada were taken from the digital medium-resolution vector shoreline data set from the US Army Corps of Engineers and Water Issues Division of Environment Canada, Ontario Region. The shoreline protection classification portion of the dataset represents the extent to which individual segments of the shoreline are protected, noting the estimated percent of a respective reach that is protected structurally. We assume that the influence of shoreline

hardening does not extend beyond 1 km into the lakes, and so the value for the shoreline pixel was then assigned to the adjacent water pixel.

**Shoreline extensions.** Groins, jetties, docks, and offshore breakwaters extend perpendicularly to the shoreline or are located offshore, and add another dimension to shoreline alteration. Such structures intercept and divert along-shore transport of sediments, potentially causing accumulation of sediments on the up-drift side and sediment starvation on the down-drift side (30, 31). We inventoried Great Lakes shoreline structures along ~86% of the Great Lakes’ 17,000 km of shoreline for docks using very high-resolution imagery (<1 m resolution) from multiple sources, with image-capture dates ranging from 2000 to 2010. For the US shoreline, the primary imagery source was 2008–2010 US Department of Agriculture National Agricultural Imagery Program imagery. For the Canadian shoreline, the primary imagery source was Google Earth supplemented with Bing Maps. The total number of large shoreline extensions was summed in each water pixel adjacent to shoreline. Groins have been reported to affect down-drift nearshore bathymetry for a distance of four times the groin length for individual groins and six times the groin length for a groin field (30). Because some structures extended as far as 0.5 km into the lakes, we applied a 2-km buffer to limit the overall effect of shoreline extensions to a distance of 2 km from the shore.

**Marinas and recreational boating.** Marinas are a potential source of chemical pollution because of boat maintenance activities and spillage of a variety of compounds (32), and may exert physical effects on the environment associated with boat wakes (33), harbor dredging, breakwaters, and shoreline structures (28). Marina locations were identified from internet sites and the number of boat slips was obtained from marina Web sites when available or were counted using aerial images. Marinas located within river-inland lake complexes were included if within 5 km of a Great Lake. We identified 726 marinas grouped into 504 locations around the Great Lakes, with an estimated 102,251 marina slips. Based on the finding that 93% of boat slips in marinas with zip codes that border the Great Lakes were occupied in 2004 (34), the estimated number of boats docked in marinas on the Great Lakes is 95,093. Studies cited above do not estimate distance of influence but we expect chemical pollution and physical disturbance to have only local effects. The influence of marinas was scaled the count of boat slips and assumed to dissipate to 10% of their initial value within 2.5 km and to 1% within 5 km.

**Category: Climate Change.** Climate change is assessed with three stressor layers: water level change, summer temperature, and winter ice cover.

**Changing water levels.** Great Lakes water levels have been relatively stable over the past 150 y, with only a 2-m difference between the recorded maximum monthly mean and the minimum monthly mean. Seasonally the lakes vary by 0.40–0.45 m (35). However, the Lakes have experienced considerable water level fluctuations in the past three decades relative to the 2-m range, with extreme high water in the 1970s to 1990s. Lake levels dramatically declined between 1997 and 2000, and are now near their recorded low. Shallow, near-shore regions of the lakes, including wetlands and river mouths, are particularly vulnerable to declines in water levels, which may result in increased demand for dredging. Although short-term lake level fluctuations can be beneficial to wetland biodiversity (36), prolonged change is likely to cause zonation shifts (37, 38), the consequences of which will depend in part on lake bathymetry. We assess water level as a stressor to the Great Lakes using the 3-m bathymetric contour. Although future changes may be less than 3 m, these shallow areas are expected to be most affected. Compilation of new bathymetry for the Great Lakes was carried out cooperatively between NOAA

(NGDC and the Great Lakes Environmental Research Laboratory), and the Canadian Hydrographic Service. Datasets from individual lakes were joined and resampled to conform to the project 1-km<sup>2</sup> grid. Where data gaps occurred near the shoreline, pixel values were populated with kriged data. Bathymetry pixels with depths <3 m are considered sensitive to climate change.

**Warming summer temperatures.** Summer surface-water temperatures appear to be increasing across the Great Lakes basin, with greater increases in the upper relative to the lower Great Lakes. Moreover, summer water temperatures appear to be warming at a faster rate than mean annual air temperatures in the upper Great Lakes (39, 40), evidently because of an earlier onset of summer stratification, which may last longer and become established at shallower depths. Model projections indicate surface temperature warming between 2000 and 2100 ranging from 0.37 to 0.93 °C per decade in Lake Superior to between 0.20 and 0.60 °C per decade in Lake Erie (41). Temperature changes will affect the metabolism of ectothermic organisms, alter the ranges and abundances of many species because of changes in thermal habitat, affect the timing of seasonal events, such as spring blooms of algae, and promote the spread of nuisance algae and invasive species. Some changes may be beneficial, however, as warmer temperatures likely will increase ecosystem productivity unless nutrients or other factors become limiting, and may expand the thermal habitat available to some native fishes. Daytime sea-surface temperature data from advanced very high-resolution radiometer satellite imagery were obtained from the NOAA CoastWatch program for the warmest three summer months (July 1 to September 30) in 1994–2010. We computed annual mean temperatures for each 3 × 3-km pixel during this 3-mo window. To calculate a water warming index, we used linear regression with least-squares fitting (regressing average temperature vs. year) and resampled estimated coefficients to the 1-km<sup>2</sup> grid. The slope of this regression represents the average temperature increase per year during the warm period of the year.

**Reduced duration of winter ice cover.** Changes in winter ice cover may influence lake levels via evaporative water loss and lead to higher water temperatures by affecting the onset of summer warming. Although the duration of winter ice cover has unquestionably decreased over the past century at locations including Grand Traverse Bay, MI (42), and Lake Superior in the vicinity of Bayfield, WI (43), trends across the surface of the Great Lakes are more complex. One measure, the annual maximum percentage of lake surface covered by ice, is highest in Lake Erie, despite having the fewest freezing degree days, because of its shallow mean depth (19 m); Lake Superior ranks second, because its high freezing degree days offset its greater mean depth (148 m). Relative ranking for the five Great Lakes also has changed across decades (44, 45). Although further analysis is needed, evidence to date and future projections suggest reductions in ice cover extent and duration characteristic of mild past winters, and Lakes Erie and Superior may show the greatest response (45). Ice cover data were obtained from NOAA's Great Lakes Ice Atlas (mostly the National Ice Cover dataset, but Canadian Ice Service data were used for dates when National Ice Cover data were not available). These data consisted of total concentrations (fraction of surface area covered) of ice across the Great Lakes basin, observed or interpolated daily in 2.5 × 2.5-km pixels throughout the winter (December 1–May 31) (44). We considered a pixel on a given day to be ice-covered if its area occupied by ice was ≥50%. For each winter from 1973 to 2002, the cumulative duration of ice cover (number of days having ice cover ≥50%) was calculated. Because the data in many pixels were not normally distributed, to determine whether there was a significant decrease in ice cover in a given pixel, Kendall's  $\tau$  and  $P$  values were calculated using the nonparametric (rank-based) Mann–Kendall test (46, 47). For pixels that exhibited a significant decrease in ice cover (defined as Mann–Kendall  $P < 0.10$

and trend direction negative), we expressed the rate of change in duration (i.e., days of ice duration lost per year) using the slope from simple linear regression, and resampled estimated coefficients to the 1-km<sup>2</sup> grid.

**Category: Coastal Development.** Coastal development was represented with five data layers: developed land, road density, mining, thermoelectric power plants, and coastal recreational use.

**Developed land.** Coastal development disrupts physical and hydrodynamic processes and generates pollutants that, because of lake proximity, may introduce diverse contaminants into near shore waters. US data were derived from the National Land Cover Dataset, a land cover classification that was derived from Landsat Enhanced Thematic Mapper+ (ETM+) satellite data. Canadian data were from the Ontario Provincial Land Cover Database, derived from Landsat-7 Thematic Mapper satellite data frames recorded between 1986 and 1997, most from the early 1990s. The extent of developed land including “settlement and developed land” in Canada and “developed” land in the United States was estimated by determining the percentage of developed land within a 5-km radius of each pixel within 1 km of the shoreline. We assume that the influence of developed land does not extend beyond 1 km into the lakes, and so the value for the shoreline pixel was then assigned to the adjacent water pixel.

**Coastal road density.** Roads are considered a distinct stressor because they provide access to the lakeshore, including in less-developed areas. Roads add to impervious surface area and alter the physical and chemical environment by contributing run-off polluted with road surface materials (48, 49). Coastal road density was derived from the Ontario Road Network 2005 on the Canadian side and TIGER/Line files from the US Census Bureau on the US side of the basin. We attempted to extract comparable data by emphasizing paved roads; identification of unpaved roads was not consistent between the metadata descriptions of the two data sources. In Canada, all surface roads of the surface type “paved” were included. For the United States, the following feature types were included: primary road, secondary road, local neighborhood road, rural road, city street, ramp, service drive, and parking lot road. We assume that the influence of roads also does not extend beyond 1 km into the lakes, and so the value for the shoreline pixel was then assigned to the adjacent water pixel.

**Mining.** Mining has the potential to introduce contaminants into lake waters and sediments, with documented impacts on aquatic life (50). We combine active and historic metal mines because of the potentially long legacy effect and often lesser regulatory restriction on historic metal mines. We also include limestone/dolomite mines, even though chemical leaching is not expected to be serious, because of the land disturbance associated with these mining operations and the large footprint of some mines. Calcite Quarry located in Rogers City, MI, on the shore of Lake Huron is the world's largest limestone mine. Quarries for excavating sand, gravel, and stones make up the vast majority of mines in the Great Lakes region, but they are not considered as a stressor here because they are unlikely to result in significant disturbance or contamination. Mine data comes from the US Geological Survey (USGS) Mineral Resources Data System (51) and the OMNR's Mineral Deposit Inventory. We consider all metal mines (historic and active) and active limestone/dolomite mines within 2 km of the shoreline of the Great Lakes to be potential sources of contaminants. Mines are not differentiated by size or likely impact because of lack of necessary data. Dispersal distance likely varies with type of material and coastal energy and currents. In addition, the signature of legacy mining has had many years to disperse. Studies document a steep drop in mine wastes away from shoreline locations of mining in the Great Lakes and note that high copper and mercury concentrations can be traced back to shoreline stamp mills and smelters

(52–54). Coarse sands from century-old copper mining along southern Lake Superior are concentrated within a few kilometers or less of shore, and a well-documented metal-rich “halo” extends tens of kilometers surrounding the Keweenaw Peninsula. We conservatively propagate the influence of mines assuming a decline to 10% of its initial value within 5 km and 1% within 10 km, and acknowledge that distances may substantially increase over time.

**Thermoelectric power plants.** Thermoelectric power generation from coal, oil, natural gas, nuclear, and biomass energy sources is the largest use of water in the Great Lakes basin (72% of all water use in 2005), with the majority of water used for plant cooling (55). Water intakes directly harm fish populations by impingement on water-intake screens and entrainment when smaller fish passing through screens are harmed by contact with infrastructure or by heat shock. Our analysis includes 114 coastal power plants located within 2 km of the Great Lakes shoreline on the assumption that these plants draw water directly from the Lakes or from major tributaries just upstream of their confluence with the Lakes. Because the size of a power station and the volume of water withdrawn are correlated (56, 57), we used power generation capacity to differentiate among power plants in size and presumed impact. Power plant data comes from the Emissions and Generation Resource Integrated Database, Statistics Canada, and the Ventyx Energy Velocity Map. Cooling water-intake locations can be as much as 500–1,000 m offshore, suggesting that impingement and entrainment of fish can encompass an area of at least 1 km and possibly more. Reported fish kills can be very large: the Bay Shore plant in Toledo, OH reported losses of 46 million adult fish impinged, and 14 million juvenile and 2 billion larval fish entrained (58). New York’s Dunkirk Generating Station on the shores of Lake Erie and Huntley Generating Station on the Niagara River reported annual losses of 63 million adult fish and 97 million adult fish, respectively, because of impingement (59). We assumed that the influence of water withdrawals would decay to 10% of its initial value within 3.5 km and be negligible beyond 7 km.

**Coastal recreational use.** Great Lakes beaches are areas of high recreational use, hosting an estimated 8 million annual visitors (60). Recreational beach use may act as a stressor because of refuse from millions of visitors, foot and vehicle traffic in sensitive dune areas, and through beach maintenance activities, including beach grooming and infrastructure to reduce erosion. We mapped beaches as point locations along the shoreline. US beach locations were derived from the US Environmental Protection Agency (US EPA) Beaches Environmental Assessment and Coastal Health (BEACH) Act geospatial database. US beaches were represented by line segments, which we converted to points using the midpoint. The locations of Canadian beaches were provided by Environment Canada, and a small number of additional beaches were identified from protected lands databases for the United States and Canada. The stressor layer is based on the locations of 1,265 beaches. Because recreational impacts from beach visits are expected to be local and minor, we applied a 1-km buffer to all beach locations to estimate the lake area impacted by beach use.

**Category: Fisheries.** Under the broad category of fisheries-related stressors to the Great Lakes we recognize five individual stressors of potential importance: commercial fishing, recreational fishing, aquaculture, native fish stocking, and nonnative fish stocking.

**Commercial fishing.** Commercial fishing in the Great Lakes has experienced dramatic changes in target species and harvests because of the combined influences of overfishing, invasive species, and environmental deterioration (61, 62). Lake Erie supports the largest and most heavily managed commercial fisheries, focused on yellow perch and walleye, and has seen recent recovery of its lake whitefish fishery. Current fisheries

emphasize yellow perch and lake whitefish in Lake Ontario; lake whitefish, walleye, and yellow perch in areas of Lakes Huron and Michigan; and cisco, lake trout, and lake whitefish in Lake Superior. Commercial fishing data were obtained from the USGS Great Lakes Science Center and from the OMNR. Commercial catch data were recorded in round pounds at a spatial resolution of 5-min grid cell for Canada and 10-min grid cell for the United States. The exceptions were the Canadian waters of Lake Ontario, where data are recorded at a much coarser “quota zone,” and the US waters of Lake Ontario, where no spatial information was associated with the data. Data for the US waters of Lake Ontario were distributed to a relatively confined area (Chaumont Bay) with a smaller amount being distributed near Fox and Grenadier Islands based on communications with OMNR biologists. Finally, the data were down-scaled assuming equal distribution of harvest within each reporting unit across our 1-km pixels, using the cubic convolution algorithm in ArcGIS.

**Recreational fishing.** Recreational fishing in the Great Lakes today exceeds commercial fishing in economic value and has the potential to influence fish stocks. Because it is difficult to quantify the spatial extent of recreational fishing by individuals, we focus solely on charter boat recreational fishing. We assume that this approximates the intensity and spatial distribution of all forms of recreational fishing (63), but we also acknowledge that private boats may travel lesser distances from shore. A list of all charter fishing boats operating on the Great Lakes was compiled from state and provincial regulatory agencies, such as Departments of Natural Resources and by searching the Internet. Latitude/longitude coordinates were obtained from marina locations or from Web sites and Google Earth. We identified 1,834 charter fishing services operating on the Great Lakes, with most located on Lakes Michigan (698) and Erie (814), and fewer on Lakes Ontario (143), Huron (78), and Superior (80). Salmon, steelhead, and lake trout were principal target species in all but Lake Erie and Lake Huron, where walleye (especially since 2000), yellow perch, and smallmouth bass were primary fish species listed on charter fishing Web sites. The spatial extent of charter fishing was estimated using the number of boats at each location as the magnitude of effect, and propagated into each lake assuming that only 10% of boats fish beyond 27.5 km from port and that the number was negligible beyond 55 km. Direct queries to a number of charter fishing operators in each lake indicate that travel distances <20 km are typical, although boats occasionally travel greater distances.

**Aquaculture.** Aquaculture is a growing industry in inland waters of the Great Lakes basin, but lake-based cage culture, which began in the mid-to-late 1980s (64), occurs only in Georgian Bay and North Channel of Lake Huron. Aquaculture can be detrimental to its immediate surrounding environment, affecting water quality via food byproducts and excreted waste from fish, leading to organic and nutrient enrichment and eutrophic conditions. Other potential problems include introduced diseases and parasites and antibiotic use. Because rainbow trout, although a nonnative species, are already established in the Great Lakes, the most likely impact of trout aquaculture is through degradation of water quality. Aquaculture locations were derived from Canadian Aquaculture Systems, Inc. and located visually using Google Earth to generate a point file of aquaculture pen locations. Ontario cage operations are reported to use low P, high digestibility feeds (65) and produce both particulate waste from fish feces and feed and dissolved nitrogenous wastes from gill and urinary excretions (66). The majority of solids may sediment within hundreds of meters of cage locations, whereas ammonium nitrogen levels have been reported to return to background at distances of 0.5–12 km. Water circulation patterns will substantially influence the extent of flushing as well. We assume that water quality effects are local, dissipating to 10% of their initial value within 5 km and to 1% within 10 km.

**Native fish stocking.** Across the Great Lakes, native fish stocking has been pursued for the rehabilitation of native fishes and restoration of native fish communities. Although it is unlikely to be an important stressor, any stocking activity has the potential to introduce disease organisms, alter the population's genetic make-up, and affect species interactions. Lake trout, lake sturgeon, Atlantic salmon, and walleye currently are stocked in some locations. Fish stocking data were derived from the Great Lakes Fish Stocking Database maintained by the Great Lakes Fishery Commission. Stocking data for native species were obtained for the years 1999–2008 for all lakes. These data, summarized by 10-min grid cell where they enter the Lakes, were then associated with a point at the center of the cell before propagating the data into the lakes. Dispersal was estimated based on several studies of fish movements. Lake trout dispersal is relatively limited, with the majority of recaptures of tagged fish occurring within 60–80 km of release. In contrast, stocked salmon appear to exhibit high mobility and seasonal migrations (67, 68). Because the majority of native fish stocked are lake trout, which disperse less than nonnative salmonids, we assumed that only 10% of stocked native fishes dispersed more than 50 km, and only 1% went as far as 100 km.

**Nonnative fish stocking.** Atlantic salmon, brown trout, Chinook salmon, coho salmon, and rainbow trout are all currently stocked in one or more of the Great Lakes (69). The stocking of nonnative salmonines may provide vectors for disease and parasite introductions and for disease and parasite spread throughout the Great Lakes because of the mobility of stocked salmonines. Furthermore, nonnative salmonines may compete with native fishes for food and spawning habitat and may cause excessive mortality to native prey and competitor species (70). On the other hand, stocked nonnative salmonines are among the most effective controls of alewife and rainbow smelt abundances and have facilitated the recovery of native fishes in Lakes Huron (71) and Michigan (72). Nonnative salmonines also play a key role in the regional economy through support of profitable sport fisheries (68). Hence, nonnative salmonine stocking plays an ambiguous ecological role with the potential to both harm native species and to facilitate rehabilitation of diminished, threatened, or extirpated native species. Nonnative fish-stocking data were derived from the Great Lakes Fish Stocking Database for the years 1999–2008. Methods are identical to those of the native species. Because the majority of nonnative fish stocked are Chinook salmon, coho salmon, and rainbow trout, which disperse widely (67, 68), we assumed that 10% of stocked nonnative fishes dispersed 100 km and 1% traveled as far as 150 km.

**Category: Invasive Species.** As of 2012 over 180 nonindigenous species were reported in the Great Lakes (73), making this ecosystem arguably the most invaded freshwater system on the planet (74). However, many nonindigenous species cause little harm (75) and some may provide positive ecological benefits. We convened an expert workshop to identify nonindigenous species as well as native nuisance species that are important threats to the Great Lakes. Workshop participants expressed greatest concern for the influence of dreissenid mussels (zebra and quagga), the sea lamprey, round gobies, wetland plants (represented by *Phragmites*), sublittoral plants (represented by Eurasian milfoil), rusty crayfish, certain zooplankters (*Bythotrephes longimanus* and *Cercopagis pengoi*), harmful algal blooms, and emerging fish diseases (represented by viral hemorrhagic septicemia). Ballast water risk received some concern but may be declining in importance. We were able to acquire sufficient data to map five of these.

**Zebra and quagga mussels.** Zebra mussels (*Dreissena polymorpha*) first appeared in the Great Lakes in Lake St. Clair in 1986 (76), followed by quagga mussels (*Dreissena bugensis*) in 1989 (77). *Dreissena* colonization has resulted in a number of physical and chemical changes to the Great Lakes. Colonization adds habitat

complexity for benthic invertebrates and creates a hard substrate in soft-sediment systems. Chemical impacts are complex and variable, as numerous studies have found dreissenid effects on total phosphorus (TP), soluble reactive phosphorus, nitrate, turbidity, and chlorophyll levels (78). When in high density, dreissenids appear to cause chlorophyll declines (79) and shunt pelagic algal production into benthic mussel biomass (80), possibly reducing food availability to upper trophic levels and thus limiting fish productivity. In addition, dreissenids may facilitate growth of the nuisance algae *Microcystis aeruginosa* (81) and *Cladophora glomerata* (82) because of increased water clarity (78), although the public may perceive greater underwater visibility as a benefit (83). Data on *Dreissena* distributions in numbers per square meter at point locations were acquired from research scientists throughout the Great Lakes region. To obtain estimates of density over the Lakes as a continuous surface, the combined densities of zebra and quagga mussels were kriged by lake.

**Sea lamprey.** Sea lamprey (*Petromyzon marinus*) invaded Lake Ontario in the early 19th century and expanded throughout the Great Lakes in the mid-20th century. The sea lamprey is considered one of the most detrimental invasive species to enter the Great Lakes (84), and is known to parasitize lake trout, nonnative salmonines, lake whitefish, lake herring, rainbow trout, burbot, and walleye. Although the sea lamprey was not solely responsible for all population collapse of lake trout, it is currently a major impediment to lake trout rehabilitation efforts (85). The abundance and distribution of sea lampreys throughout the Great Lakes has not been determined. However, adults enter rivers to spawn, and spawning numbers are estimated from surveys and modeling (86). Estimates of the number of spawning adults per river during 2000–2009 were acquired from the Great Lakes Fishery Commission and used as a proxy for the distribution and relative abundance of young lampreys seeking hosts. There is limited information on the distance traveled by host-seeking lampreys and the additional dispersal distance that occurs by “hitch-hiking,” but distances likely are comparable to salmonine dispersal estimates given above. A mark-recapture study from northern Lake Huron reported that 78% of recaptures were within 100 km of release (87); in Lake Champlain lampreys were captured up to 64 km from natal streams (88). We estimated the lake area most affected by parasitic sea lampreys using an exponential decay model with the assumption that only 10% traveled as far as 100 km from their natal river, and only 1% dispersed as far as 150 km.

**Ballast water invasion risk.** Since the opening of the St. Lawrence Seaway in 1959, ballast water release from ocean vessels is the most probable vector for almost two-thirds of invasions, including some of the most notorious Great Lakes invaders such as zebra and quagga mussels and round gobies (74, 77). Because of the importance of ballast water release as an invasion pathway, control measures have been enacted. Ballast water exchange, the exchange of fresh or estuarine water with sea water to purge or kill organisms in ballast tanks, has been required since 1993. Saltwater flushing instituted after 2006 further requires sea water rinsing of ballast tanks of Great Lake-bound ships. The effectiveness of these control measures remains a matter of debate (89, 90), although the importance of ballast water as a pathway likely is diminishing (91). However, ballast discharges from ships confined to the Great Lakes account for 95% of all ballast water discharges and may facilitate the secondary transport of species that have already been introduced (92). As a proxy for propagule pressure, we mapped the total volume of ballast water discharged at each port using discharge data from a recent ballast water risk assessment carried out by the Canadian Department of Fisheries and Oceans (18). Correction factors of 0.1 and 0.01 were applied to discharge volumes from foreign and coastal vessels, respectively, to account for the reduction in propagules that occurred as a result of ballast water management activities

such as ballast water exchange or saltwater flushing. Propagule pressure is only one factor affecting invasion success (93), which also is facilitated by favorable environmental conditions and release into sheltered areas to limit physical dispersion (94). Tracer particles released into the semienclosed port of Goderich, ON, Canada, showed rapid dilution, with some particles were collected up to 7.5 km outside the harbor (94). We assume that propagules of invasive species introduced from ballast water are concentrated in the vicinity of the port and decay to 10% of their initial abundance in 2.5 km and to 1% at 5 km.

**Round gobies.** The round goby (*Neogobius melanostomus*) is a bottom-dwelling fish whose native range is in Eurasia. The round goby was first observed in the St. Clair River (95), presumably a ballast water introduction, and is now widespread in all Great Lakes except Lake Superior, where it is reported from only a few locations. It is especially abundant in Lakes Erie and Ontario. The round goby population of western Lake Erie was estimated at 9.9 billion individuals (96). The round goby preys on eggs and fry of other fish as well as benthic invertebrates. They frequent shallow waters (<15–20 m) during the warm season and some migrate to deeper waters (80 m or more) during winter. The impact of round gobies on lake ecosystems is variable. Declines in native species have been ascribed to both predation and competition (97, 98). Round gobies have also been implicated in the spread of botulism to piscivorous birds (99). On the other hand, gobies heavily consume zebra mussels and are themselves consumed by piscivorous sports fish, such as smallmouth bass (100). We obtained records of observed round goby locations within the Great Lakes and from rivers within 5 km of the Lakes. We modeled habitat suitability for round gobies based on environmental variables hypothesized to influence goby distributions: average summer temperature (over the warmest 3 mo for 17 y, July 1–September 30, 1994–2010), average chlorophyll a levels in May 2008 (based on SeaWiFS satellite imagery), depth, and dreissenid densities. We ran models both with and without substrate type, but the resulting models were statistically equivalent, so we present results from the model without substrate. Models were run in Maxent software with default settings, and they were validated with 10-fold cross-validation and test omission. The resulting model was highly discriminative based on standard performance measures (mean area under the curve = 0.94). The predicted habitable locations for round gobies represent probable extent of occupancy and do not reflect relative abundance. This map also excludes deep-water observations, which are too few to model at present and generally are from autumn and winter surveys.

**Wetland plants: *Phragmites*.** Invasive common reed *Phragmites australis* subspecies *australis* forms dense monocultures, which crowd out native plants, inhibit animal movement, serve as a poor quality food for animals, and slow decomposition (101). In freshwater habitats, evidence suggests decreases in turtle, bird, and amphibian populations, plant diversity, nutrient cycling, and microhabitat conditions (102–104). Although several genotypes of *P. australis* (subspecies *americanus*) are native to North America, exotic genotypes (particularly haplotype M from Europe) have been present in the Great Lakes region since the 1910s and expanded rapidly starting in the 1960s, nearly entirely displacing the native genotypes (102, 105). Invasive *Phragmites australis* location data came from three sources: (i) United States only: estimated occurrences of large monotypic stands on land 0–10 km from the Great Lakes shoreline derived from PALSAR remote sensing imagery (106); (ii) Canada only: georeferenced point occurrences from Ontario Natural Heritage Information Centre (107); and (iii) Canada only: georeferenced point occurrences from Global Biodiversity Information Facility (108). Both subspecies *australis* and unknown subspecies records were used from the Canadian datasets, but unknown subspecies records in Lake Superior were eliminated because they were likely

the native subspecies [no subsp. *americanus* found in extensive surveys along Lake Superior (106)]. We used a 10-km shoreline buffer to eliminate observations further inland. Roadside Canadian locations were converted to stands using a 500-m buffer on the assumption that these were stands too small to be detected in the remote sensing data. For all other Canadian observations, we used a 5-km buffer, because *Phragmites* dispersal distances are frequently this large (109). To propagate the effects of the stands (most of which were on land) into the lakes, for every 1-km<sup>2</sup> waterside shoreline pixel, we calculated the distance to the nearest invasive *Phragmites* patch. We normalized these data assuming that closer proximity to *Phragmites* had stronger negative effects (intensity 0 = no effect of *Phragmites* because all stands were >10 km away; intensity 1 = *Phragmites* stand located in that pixel).

**Category: Nonpoint Pollution.** Run-off from land includes materials transported by surface and subsurface (including through infrastructure) run-off. We consider materials that originate from both point and diffuse sources, including watersheds and atmospheric sources. We use four data layers: inputs of suspended sediments, nitrogen, phosphorus, and combined sewer overflows (CSOs) to the Great Lakes.

**Suspended sediments.** Sediments exported from rivers cause turbidity, which can interfere with algal growth and prey location by visual predators, and alter benthic habitat conditions. Annual loads of suspended sediments (SS) were obtained from several sources (110–113). Data for Canadian tributaries were averages for 1972–2005, except tributaries for Lake Superior, which were averages for 1990–2009. Data for US tributaries were averages for 1975–1990, and some Lake Erie tributary data were averages for 1997–2001. Because locations with SS data only partly aligned with our list of major tributaries with nitrate and TP data, we estimated missing SS loads using lake-specific regressions of sediment load against watershed area, and examined all estimated values for consistency with neighboring sites. Forty of the 119 sites were regression estimates (Lake Superior, 6; Lake Michigan, 12; Lake Huron, 9; Lake Erie, 10; Lake Ontario, 3).

Annual sediment loads were propagated from river mouths using an exponential decay model as described above (*SI Materials and Methods*). Because most of the load is delivered during episodes of high run-off, which tend to occur in the winter and spring, we examined satellite images of river plumes during high run-off events to estimate dispersal of transported material. Mapping of the Maumee River plume using MODIS imagery adjusted with observed Secchi disk transparency (113) found plume extent to vary among dates and years. Plumes are deflected along the southern shore of Lake Erie by inflow from the Detroit River, with typical extent of ~10 km outward and 25 km along the southern shore. We infer that a decay coefficient that reduces the sediment load to 10% of its initial value over a distance of 10 km is reasonable. Plumes were terminated at 1% of initial value, which occurred in ~20 km. We acknowledge that sediment transport may differ among locations due to along-shore currents, natural embayments and man-made harbor structures.

**Nitrogen.** Various forms of nitrogen in fresh water may stimulate algal growth and contribute to eutrophic conditions. Nitrogen input to the Great Lakes is represented by nitrate (+ nitrite), which typically comprises the majority of total inorganic nitrogen. Tributary nitrate loads were averaged for 1994–2008 except for Lake Erie, where tributary data were available only for 2005 (114). However, whole lake totals for Lake Erie were available for 2003–2007, and establish that 2005 was a midrange year. These estimated inputs include the most important tributary sources and comprise ~60–80% the total tributary load to each lake, because of the omission of small watersheds the inclusion of which is impractical. Atmospheric deposition of nitrate to the lakes' surfaces was estimated using National Atmospheric De-



position Program data for wet nitrate deposition and Clean Air Status and Trends Network (CASTNET) data for dry deposition. To provide a 5-y average of total atmospheric deposition of nitrate, 2003–2007 CASTNET (dry deposition) data were downloaded for all neighbor sites of the Great Lakes Basin, and 5-y averages of dry-to-wet deposition ratios were calculated. To obtain a data layer for total deposition of nitrate-N (dry + wet), wet deposition was multiplied by (1 + dry to wet ratio) using ArcGIS, following methods in Han and Allan (115). Estimated tributary and atmospheric inputs are consistent with other estimates for the Great Lakes region (115–117). Tributary loads were propagated spatially based on the assumption that because nitrate is exported as a solute it decays more slowly than sediments, declining to 10% of initial levels at 15 km and 1% of initial at 30 km. Propagated nitrate was then combined with atmospheric deposition over the lake surface.

**Phosphorus.** Phosphorus run-off from watersheds is considered the most important driver of eutrophication and the proliferation of nuisance algae. Phosphorus inputs to the Great Lakes are represented by TP, and include both tributary and atmospheric inputs. Tributary TP loads from Dolan and Chapra (114) were averaged for 1994–2008 except for Lake Erie, where tributary data were averaged for 2003–2007. Because the watersheds of included tributaries encompass only 60–90% of the total drainage area of each lake, estimated tributary loading of TP is likewise reduced. Atmospheric deposition of phosphorus to the surface of the Great Lakes is a small amount and not well quantified, with estimates ranging from 5 to 25 kg·km<sup>-2</sup> (118). We used an average value of 8 kg·km<sup>-2</sup> across the upper lakes and 16 kg·km<sup>-2</sup> for Lake Erie and Lake Ontario. Tributary phosphorus loads include particulate P associated with fine sediments and dissolved P; because dissolved P is considered more biologically available and P associated with fine particles may dissociate into soluble form in response to concentration gradients, we elected to use the same decay coefficient as for nitrogen. Tributary loads were propagated spatially based on the assumption that loads declined to 10% of initial levels at 15 km and 1% of initial at 30 km. Propagated TP was then combined with atmospheric deposition over the lake surface. The resultant spatial patterns are broadly consistent with published TP contours for Lake Erie (119) and Lake Ontario (120).

**Combined sewer overflows.** Combined sewers that collect sanitary sewage and stormwater run-off into a single pipe system are found in many Great Lakes cities, where overflows can occur during heavy storms. Under wet weather conditions, high stormwater volumes may result in the discharge of untreated sewer waste into surface waters. In addition, stormwater may contribute pollutants, such as oil and grease from vehicles, fecal bacteria from pet and wildlife waste, and pesticides and lawn chemicals that accumulate on diffuse surfaces during dry periods. We obtained the number of CSO outfalls for US communities within 10 km of the Great Lakes shoreline from the US EPA (121). We used a combination of state agency reports to determine CSO discharge volumes. When discharge volume data were not available, we estimated discharge based on the number of outfalls present using a log-linear regression between discharge volume and number of outfalls (Adjusted  $R^2 = 0.59$ ). Although Chicago's 369 CSO outfalls normally discharge away from Lake Michigan, heavy and sustained rainfall can cause 303 of Chicago's outfalls to empty into the lake. Information on CSO contributions from communities and estimated discharge volumes for Canadian cities was obtained from MacDonald and Podolsky (122). Although our data contain a number of uncertainties, we were able to estimate CSO discharge volume for 48 cities bordering the Great Lakes in millions of gallons per day. Surveys of the near shore of western Lake Ontario found that levels of solids, major ions, and *Escherichia coli* declined sharply away from shoreside areas, with little or subtle decline beyond 1–3 km (123). We assumed that

the influence of CSO discharge declined to 10% at 3.5 km from an outfall and was negligible beyond 7 km.

**Category: Toxic Chemicals.** The Great Lakes are influenced by a great diversity of toxic chemicals, including legacy and current contaminants, as well as chemicals of emerging concern. We characterized toxic chemicals with data layers for mercury, copper, and polychlorinated biphenyl compounds (PCBs). Because the majority of the areas of concern (AOCs) in the Great Lakes are associated with contaminants we included the 39 remaining AOCs as a fourth stressor.

**Mercury.** Mercury is an important toxic substance affecting human and ecosystem health in the Great Lakes (124, 125), and an example of a biomagnifying toxic metal. Human exposure to methylmercury in the Great Lakes basin is primarily through freshwater fish consumption (126). We mapped surficial sediment mercury concentration using near-shore values obtained from a collection of monitoring projects compiled by the NOAA Assessment and Restoration division and in-lake values collected by the sediment monitoring program by Environment Canada (127). Data were kriged using ArcGIS algorithms with a five-point neighborhood.

**Copper.** Metal contamination including lead, nickel, copper, zinc, and cadmium may harm organisms at low concentrations if the metal compounds are in a bioavailable form, but rarely cause ecological effects through biomagnification. We focus on copper as an industrial metal of concern known to occur at elevated concentrations in the Great Lakes. Copper can be highly toxic at low concentrations to invertebrates and to fish in early life stages (128) and can result in food web disruption. We mapped surficial sediment copper concentration from two data sources. Near-shore datapoints were obtained from collection of monitoring and restoration projects (as for mercury), and in-lake data values were provided by Environment Canada (129). Data were kriged using ArcGIS algorithms with a five-point neighborhood.

**PCBs.** PCBs are a class of legacy organochlorines that share a structural similarity and toxic mode of action with Mirex, Toxaphene, and dioxin, all known to exert multiple toxic effects throughout the food web in lakes (130). PCBs were widely used as coolants and insulating fluids and in a variety of other industrial uses, but their manufacture and importation to North America ended in 1977–1980. As with other restricted legacy organochlorines, PCBs are extremely resistant to degradation and persist for decades in the environment. Like methylmercury, PCBs bioaccumulate rapidly through food chains, resulting in restrictions on fish consumption (131) and concerns for wildlife health (130). We mapped surficial sediment PCB concentrations from Environment Canada (129). Data were kriged using ArcGIS algorithms with a five-point neighborhood.

**Areas of Concern.** The US EPA and Environment Canada designated 43 AOCs under the Great Lakes Water Quality Agreement, a binational agreement to ensure the long-term maintenance of the “chemical, physical, and biological integrity of the Great Lakes Ecosystem” (132). Sediment contamination is the most common cause of AOC listing. AOCs range in size from those covering entire watersheds to portions of watersheds, segments of rivers, stretches of shoreline, and individual bays and harbors. Generally, the AOCs are associated with a river mouth, and their area of influence in the lakes themselves is largely undefined. However, sediment contamination is generally localized at river mouths and harbor areas of human dominated watersheds, where fine-grained sediments have been deposited over time (133). We represent the influence of the 39 remaining AOCs (four have been delisted) on the Great Lakes by first eliminating those located more than 10-km inland from the shoreline. For 13 AOCs, where the official AOC boundary extended into a Great Lake, we used that boundary to define the area of influence. The influence of remaining AOCs was spatially delineated as an area

extending 5 km from the river mouth. All AOCs were considered to exert equal stress.

### SI Ecosystem Services

We use the locations of beaches, marinas, and important bird-watching sites to represent high-value recreational activities. To address provisioning services, we quantify two aspects of fisheries: the spatial distribution and magnitude of commercial harvests, and the home port for charter fishing vessels. We also assess spawning locations for two important species in recreational and commercial fisheries: lake trout and yellow perch. We investigate the spatial correspondence between each service and CS by testing whether the rank order of locations for a given service (e.g., each beach) is random with respect to CS values of all pixels. The 1:1 line reflects the null hypothesis that locations of service provisioning are randomly distributed across all stress levels (Fig. 4C). Although it was not feasible to assign a use or value to each service at each location, all seven measures warrant inclusion as ecosystem services. Commercial fishing, recreational fishing by charter boat, and recreational boating from marinas each could in principle be quantified directly, whereas human visitation of birding and beach sites, and use of spawning sites by lake trout and yellow perch, are more difficult. Birding locations were selected by expert consultation (see below) and represent a modest number of highly valued sites from a much larger potential pool. It is not feasible to demonstrate that every beach and spawning site is used, but it is a reasonable assumption that all deliver some service over multiple years.

To explore the assumption that CS is the appropriate measure of stress, we identified a subset of 3–10 stressors likely to have the greatest impact on each specific service (Table S3), and recalculated a new stress index specific to each service. The disproportionately high stress at service locations remained evident in this refined analysis (Fig. 4D), although the skew was slightly less pronounced for most services. This service-specific analysis supports the conclusion that sites where society depends upon ecosystem services from the Great Lakes are generally more stressed than expected by chance.

We estimated stress (CS or service-specific) for each service with a 5-km buffer around the service point. Although it is likely that some services (e.g., beaches) are sensitive to stress at a smaller scale, we chose to use 5-km buffers in all instances for consistency and to reduce the risk that an individual pixel might be an outlier.

**Beach Use.** The annual recreational value of Ontario's Great Lakes beaches has been estimated at C\$200–259 million (134), and the US Great Lakes beaches have been valued at US\$1.1–1.4 billion (135). As with the stressor layer, American beach locations were derived from the US EPA BEACH Act Geospatial database. US beaches were represented by line segments, which we converted to points using the midpoint of each segment. The locations of Canadian beaches were provided by Environment Canada, and a small number of additional beaches were identified from protected lands databases for the United States and Canada (Fig. S5A). We created a stress metric specific to beaches summing five individual stressors considered most likely to adversely affect beach use (Table S3).

**Recreational Boating.** Recreational boating and boating-related expenditures in the US Great Lakes totaled an estimated \$16 billion and directly supported 107,000 jobs in 2003 (34). We used the locations of marinas (Fig. S5B) to represent the spatial distribution of recreational boating on the Great Lakes from the data layer reported earlier. We created a stress metric specific to recreational boating by summing four individual stressors considered most likely to adversely affect this activity (Table S3).

**Birding.** The Great Lakes basin is home to an estimated 5 million birding enthusiasts who frequent shoreline hotspots during all seasons (60). Across the United States, an estimated 48 million US residents engaged in bird-watching activities, adding \$82 billion to the US economy in 2006 (136). We mapped locations representing the most highly used and valued birding hotspots in the Great Lakes region that were located within 2 km of the shoreline using data from several sources, including recommendations of top birding locations from state and provincial bird record committees and ornithological organizations, recognized "birding hotspots," sites along birding trails, and sites hosting birding festivals. Our mapped birding locations represent areas adjacent to the Great Lakes where birding activity is most concentrated (Fig. S5C). We created a stress metric specific to birding by summing three individual stressors considered most likely to adversely affect this activity (Table S3).

**Recreational Fishing.** Between the United States and Canada, an estimated 1.8 million anglers report fishing on the Great Lakes (137, 138). Because fishing by individuals is difficult to quantify, we used charter fishing as a measure of recreational fishing effort. In Michigan alone, charter fishing contributed nearly \$15 million in gross sales to coastal communities (139). Fig. S5D shows the spatial distribution of charter fishing. We created a stress metric specific to recreational fishing by summing ten individual stressors considered most likely to adversely affect this activity (Table S3).

**Commercial Fishing.** The spatial distribution of commercial fishing (Fig. S5E) exhibits only partial overlap with charter fishing, because the former targets primarily lake trout, lake whitefish and chubs, and the latter primarily nonnative Pacific salmonids, walleye, and yellow perch. Spatial overlap between commercial and recreational harvest of lake trout and lake whitefish is further reduced by harvest treaties negotiated with Native American tribes and establishment of lake trout refuges. However, there is overlap, particularly over harvest of yellow perch and walleye in Lake Erie and Saginaw Bay of Lake Huron, and nontribal harvest of lake trout in the upper lakes. We created a stress metric specific to commercial fishing by summing ten individual stressors considered most likely to adversely affect this activity (Table S3).

**Lake Trout Spawning.** Lake trout are valued by recreational and commercial fishers. In addition, as a native species in decline they are stocked in several lakes to encourage recovery. Thus, spawning areas are important to natural recruitment. Lake trout spawning locations were derived from the *Atlas of Spawning and Nursery Areas of Great Lakes Fishes*, a comprehensive binational survey of commercially and recreationally valuable fishes (140). Records of lake trout spawning occur primarily in Lakes Superior, Michigan and Huron. Lake trout are fall spawners that require cold water (3–14 °C) and rocky substrate with adequate interstitial spaces to protect eggs from predators and wave action (140, 141). Fig. S5F shows the spatial distribution of lake trout spawning locations, which we assume are all used. We created a stress metric specific to lake trout spawning by summing seven individual stressors considered most likely to adversely affect this activity (Table S3).

**Yellow Perch Spawning.** Yellow perch also are valued by recreational and commercial fishers, and their spawning areas are important to natural recruitment. Yellow perch spawning locations were again derived from the atlas developed by Goodyear et al. (140). Wei et al. (142) found the distribution of yellow perch to be highly correlated with coastal wetlands, and suggested that yellow perch favor protected embayments in particular for spawning and nursery habitat. Fig. S5G shows the spatial

distribution of yellow perch spawning locations, which we assume are all used. We created a stress metric specific to yellow perch spawning by summing nine individual stressors considered most likely to adversely affect this activity (Table S3).

### SI Multivariate Analyses of Areas of High Stress

If a small number of stressor intensity combinations caused high CS values, we expected nonhierarchical cluster analysis would allow us to identify this pattern. We used the *K*-means algorithm in R (143) with 1–20 clusters (10 random starts, maximum 25 iterations, other settings default). The amount of variation explained by each additional cluster decreased steadily without an obvious breakpoint, suggesting no small number of clusters that captured the variation among pixels well (Fig S6A). Inspection of resulting clusters (e.g., six-cluster solution in Fig. S6B) indicated that many different combinations of stressor intensities were responsible for the high CS scores.

We also performed principal components analysis (PCA) using the *prcomp()* algorithm in R (143) to assess whether linear

combinations of stressor intensities could summarize most of the variation among high stress pixels. Assumptions of PCA, such as multivariate normality, were not fully met, but this technique is still acceptable for exploratory purposes under these circumstances (144). No rescaling was used in the computations, because the data were already transformed to similar scales. For plotting only, we rescaled loadings (arrows in biplot, Fig. 3C) based on the minima and maxima of site scores and factor loadings. We found the first two components to account for 32.7% of the variation in stressor intensities (axis 3 = 9.2%, axis 4 = 7.6%). Many of the same stressors that had high correlations with the overall CS map (Fig. 3A) loaded highly on the first two PCA components (Fig. 3C), and the first two components captured gross differences among the high stress areas across lakes (Fig. 3C). However, as expected from cluster analysis results, the resulting biplot showed no major clustering of sites (Fig. 3C). This result again suggested that no discrete sets of stressors are predictably high in a given high stress area.

- Halpern BS, et al. (2008) A global map of human impact on marine ecosystems. *Science* 319(5865):948–952.
- Danz NP, et al. (2007) Integrated measures of anthropogenic stress in the U.S. Great Lakes basin. *Environ Manage* 39(5):631–647.
- Teck SJ, et al. (2010) Using expert judgment to estimate marine ecosystem vulnerability in the California Current. *Ecol Appl* 20(5):1402–1416.
- Vörösmarty CJ, et al. (2010) Global threats to human water security and river biodiversity. *Nature* 467(7315):555–561.
- Thomas RL (1988) Distribution and composition of the surficial sediments of Georgian Bay and North Channel. *Hydrobiologia* 163(1):35–45.
- Thomas RL, Dell CI (1978) Sediments of Lake Superior. *J Great Lakes Res* 4(3–4):264–275.
- Thomas RL, Kemp ALW, Lewis CFM (1973) The surficial sediments of Lake Huron. *Can J Earth Sci* 10(2):226–271.
- Thomas RL, Kemp ALW, Lewis CFM (1972) Distribution, composition, and characteristics of the surficial sediments of Lake Ontario. *J Sediment Petrol* 42(1):66–84.
- Powers CF, Robertson A (1968) Subdivisions of the benthic environment of the upper Great Lakes, with emphasis on Lake Michigan. *J Fish Res Board Can* 25(6):1181–1197.
- Great Lakes Basin Framework Study (1975) *Appendix 4: Limnology of Lakes and Embayments* (Great Lakes Basin Commission, Ann Arbor, MI).
- Robbins JA (1986) *Sediments of Saginaw Bay, Lake Huron: Elemental Composition and Accumulation rates* (Great Lakes Research Division, Univ of Michigan, Ann Arbor, MI), p 103.
- Wood KG (1958) Bottom deposits of Saginaw Bay, Michigan. PhD thesis (Michigan State Univ, East Lansing, MI).
- Rasul N, Coakley JP, Pippert R (1999) *Sedimentary Environment of Western Lake Erie: Geologic Setting, Sediment Distribution and Anthropogenic effects*. *State of Lake Erie—Past, Present and Future*, eds Munawar M, Edsall TA, Munawar IF (Backhuys, Leiden, The Netherlands).
- Lewis M (1966) Sedimentation studies of unconsolidated deposits in the Lake Erie basin. PhD thesis (University of Toronto, Toronto, ON, Canada).
- Arend KK, et al. (2011) Seasonal and interannual effects of hypoxia on fish habitat quality in central Lake Erie. *Freshw Biol* 56(2):366–383.
- Great Lakes Maritime Task Force (2007) *Great Lakes Shipping* (GLMTF, Toledo, OH). Available at [http://www.glmtf.org/great\\_lakes\\_shipping.html](http://www.glmtf.org/great_lakes_shipping.html). Accessed March 2011.
- Great Lakes Maritime Research Institute (2011) *Great Lakes Ports* (Great Lakes Maritime Research Institute Data Clearinghouse, Toledo, OH). Available at [http://www.maritime.utoledo.edu/Documents/Data\\_Viewer/Port\\_docks\\_airp\\_term/Great\\_Lakes\\_Ports.pdf](http://www.maritime.utoledo.edu/Documents/Data_Viewer/Port_docks_airp_term/Great_Lakes_Ports.pdf). Accessed February 2011.
- Bailey SA, et al. (2012) *Risk Assessment for Ship-Mediated Introductions of Aquatic Nonindigenous Species to the Great Lakes and Freshwater St. Lawrence River*. (DFO Canada Science Advisory Secretariat, Ottawa, Canada).
- US Army Corps of Engineers (2011) *Waterway Network* (Great Lakes Maritime Research Institute Data Clearinghouse, Toledo, OH).
- Colautti RI, et al. (2004) Spatial and temporal analysis of transoceanic shipping vectors to the Great Lakes. *Invasive Species: Vectors and Management Strategies*, eds Ruiz GM, Carlson JT (Island Press, Washington, DC), pp 227–246.
- Office of Coastal Survey (2012) *United States Coast Pilot 6*, 42nd edition. (National Ocean Survey, National Oceanic and Atmospheric Administration, Washington, DC).
- Liskauskas A, et al. (2004) *Environmental Objectives for Lake Huron: Final Report of the Environmental Objectives Working Group of the Lake Huron Technical Committee* (Great Lakes Fishery Commission, Ann Arbor, MI).
- Eagle AC, et al. (2005) *Michigan's Wildlife Action Plan* (Michigan Department of Natural Resources, Lansing, MI).
- Bredin J (2002) *Lake Huron Initiative Action Plan* (Michigan Department of Environmental Quality, Lansing, MI).
- Crosbie B, Chow-Fraser P (1999) Percentage land use in the watershed determines the water and sediment quality of 22 marshes in the Great Lakes basin. *Can J Fish Aquat Sci* 56(10):1781–1791.
- Wood WL (1988) Effects of seawalls on profile adjustment along Great Lakes coastlines. *J Coastal Res* (Special Issue No. 4):135–146.
- Shabica C, Pranschke F (1994) Survey of littoral drift sand deposits along the Illinois and Indiana shores of Lake Michigan. *J Great Lakes Res* 20(1):61–72.
- Meadows GA, et al. (2005) Cumulative habitat impacts of nearshore engineering. *J Great Lakes Res* 31(Suppl 1):90–112.
- US Environmental Protection Agency; State of the Lakes Ecosystem Conference (2009) Indicator #8131: Extent of hardened shoreline. *State of the Great Lakes 2009* (Environmental Protection Agency, Washington, DC).
- Meadows GA, Meadows LA, Carpenter DD, Wood WL, Caufield B (1998) The Great Lakes grown performance experiment, phase II: Effects of a groin field. *Shore Beach* 66(2):14–18.
- Keillor P, ed (2003) *Living on the Coast: Protecting Investments in Shore Property on the Great Lakes* (Wisconsin Sea Grant and the U.S. Army Corps of Engineers, Detroit District, Detroit, MI). Available at <http://aqua.wisc.edu/publications/PDFs/ProtectingCoastalInvestments.pdf>. Accessed October 2011.
- US Environmental Protection Agency (2001) *National Management Measures Guidance to Control Nonpoint Source Pollution from Marinas and Recreational Boating* (US EPA Office of Water, Washington, DC).
- National Oceanic and Atmospheric Administration (2007) *Stressors from Marina and Boating Activities* (Office of Ocean and Coastal Resource Management, Washington, DC).
- US Army Corps of Engineers (2008) *Great Lakes Recreational Boating*, (US Army Corps of Engineers, Detroit District, Detroit, MI). Available at [http://www.lre.usace.army.mil/\\_kd/Items/actions.cfm?action=Show&item\\_id=6197&destination=ShowItem](http://www.lre.usace.army.mil/_kd/Items/actions.cfm?action=Show&item_id=6197&destination=ShowItem). Accessed April 2012.
- Lofgren BM, et al. (2002) Evaluation of potential impacts on Great Lakes water resources based on climate scenarios of two GCMs. *J Great Lakes Res* 28(4):537–554.
- Gathman JP, Albert DA, Burton TM (2005) Rapid plant community response to a water level peak in northern Lake Huron coastal wetlands. *J Great Lakes Res* 31(Suppl 1):160–170.
- Keddy PA, Fraser LH (2000) Four general principles for the management and conservation of wetlands in large lakes: The role of water levels, nutrients, competitive hierarchies and centrifugal organization. *Lakes Reserviors: Res Manage* 5(3):177–185.
- Mortsch LR, Ingram J, Hebb A, Doka S, eds (2006) *Great Lakes Coastal Wetland Communities: Vulnerability to Climate Change and Response to Adaptation Strategies: Final Report Submitted to the Climate Change Impacts and Adaptation Program* (Natural Resources Canada, Environment Canada, and Canada Department of Fisheries and Oceans, Toronto, Canada).
- Austin JA, Colman SM (2007) Lake Superior summer water temperatures are increasing more rapidly than regional air temperatures: A positive ice-albedo feedback. *Geophys Res Lett* 34:L06604.
- Dobiesz NE, Lester NP (2009) Changes in mid-summer water temperature and clarity across the Great Lakes between 1968 and 2002. *J Great Lakes Res* 35(3):371–384.
- Trumpickas J, Shuter BJ, Minns CK (2009) Forecasting impacts of climate change on Great Lakes surface water temperatures. *J Great Lakes Res* 35(3):454–463.
- Assel RA, Robertson DM (1995) Changes in winter air temperatures near Lake Michigan, 1851–1993, as determined from regional lake-ice records. *Limnol Oceanogr* 40(1):165–176.
- Howk F (2009) Changes in Lake Superior ice cover at Bayfield, Wisconsin. *J Great Lakes Res* 35(1):159–162.
- Assel R, Cronk K, Norton D (2003) Recent trends in Laurentian Great Lakes ice cover. *Clim Change* 57(1–2):185–204.
- Assel RA (2005) Classification of annual Great Lakes ice cycles: Winters of 1973–2002. *J Clim* 18(22):4895–4905.
- Schlagel JD, Newton CM (1996) A GIS-based statistical method to analyze spatial change. *Photogramm Eng Remote Sensing* 62(7):839–844.
- Hipel KW, McLeod AI (2005) Nonparametric tests for trend detection. *Time Series Modelling of Water Resources and Environmental Systems*, eds Hipel KW, McLeod AI (Elsevier, New York, NY).

48. Forman RTT, Alexander LE (1998) Roads and their major ecological effects. *Annu Rev Ecol Syst* 29:207–231.
49. Trombulak SC, Frissell CA (2000) Review of ecological effects of roads on terrestrial and aquatic communities. *Conserv Biol* 14(1):18–30.
50. Kraft K, Sypniewski R (1981) Effect of sediment copper on the distribution of macroinvertebrates in the Keweenaw Waterway. *J Great Lakes Res* 7(3):258–263.
51. US Geological Survey (2005) *Mineral Resources Data System (MRDS)* (US Geological Survey, Washington, DC).
52. Kerfoot WC, Harting S, Rossmann R, Robbins JA (1999) Anthropogenic copper inventories and mercury profiles from Lake Superior: Evidence for mining impacts. *J Great Lakes Res* 25(4):663–682.
53. Kerfoot WC, Harting SL, Jeong J, Robbins JA, Rossmann R (2004) Local, regional, and global implications of elemental mercury in metal (copper, silver, gold, and zinc) ores: Insights from Lake Superior sediments. *J Great Lakes Res* 30(Suppl 1):162–184.
54. Kerfoot WC, et al. (2012) Light detection and ranging (LiDAR) and multispectral studies of disturbed Lake Superior coastal environments. *Limnol Oceanogr* 57(3):749–771.
55. Mills PC, Sharpe JB (2010) *Estimated Withdrawals and Other Elements of Water Use in the Great Lakes Basin of the United States in 2005* (US Geological Survey, Washington, DC), p 95.
56. Kelso JR, Milburn GS (1979) Entrainment and impingement of fish by power plants in the Great Lakes which use the once-through cooling process. *J Great Lakes Res* 5(2):13.
57. Bevelhimer M, Coutant C (2003) *Impacts of Volumetric Flow Rate of Water Intakes on Fish Populations and Communities*. (Electric Power Research Institute, Palo Alto, CA), p 154.
58. Tech T (2009) *Bay Shore Power Plant: Intake and Thermal Discharge NPDES Compliance Evaluation* (US Environmental Protection Agency, Washington, DC).
59. Rabin K, et al. (2010) *Reeling in New York's Aging Power Plants: The Case for Fish-Friendlier Power* (Network for New Energy Solutions, New York).
60. Austin JC, Anderson S, Courant PN, Litan RE (2007) *Healthy Waters, Strong Economy: The Benefits of Restoring the Great Lakes Ecosystem* (Great Lakes Economic Initiative, The Brookings Institution, Washington, D.C.).
61. Taylor WW, Ferreri CP, eds (2000) *Great Lakes Fisheries Policy and Management: A Binational Perspective* (Michigan State Univ Press, East Lansing, MI).
62. Smith SH (1968) Species succession and fishery exploitation in the Great Lakes. *J Fish Res Board Can* 25(4):667–693.
63. Adlerstein SA, Rutherford ES, Clapp D, Clevenger JA, Johnson JE (2007) Estimating seasonal movements of Chinook salmon in lake Huron from efficiency analysis of coded wire tag recoveries in recreational fisheries. *N Am J Fish Manage* 27(3):792–803.
64. Moccia RD, Naylor S, Reid G (1997) *An Overview of Aquaculture in Ontario* (University of Guelph, Guelph, Canada).
65. Bureau DP, Gunther SJ, Cho CY (2003) Chemical composition and preliminary theoretical estimates of waste outputs of rainbow trout reared in commercial cage culture operations in Ontario. *N Am J Aquaculture* 65(1):33–38.
66. Podemski CL, Blanchfield PJ (2006) Overview of the environmental impacts of Canadian freshwater aquaculture. A scientific review of the potential environmental effects of aquaculture in aquatic ecosystems. *Can Tech Rep Fish Aquat Sci* 2450(V):30–79.
67. Benjamin DM, Bence JR (2003) *Spatial and Temporal Changes to the Lake Michigan Chinook Salmon Fishery, 1985–1996* (Michigan Department and Natural Resources and Environment, Ann Arbor, MI).
68. Adlerstein SA, Rutherford ES, Claramunt RM, Clapp DF, Clevenger JA (2008) Seasonal movements of Chinook salmon in Lake Michigan based on tag recoveries from recreational fisheries and catch rates in gill-net assessments. *Trans Am Fish Soc* 137(3):736–750.
69. US Fish and Wildlife Service; Great Lakes Fishery Commission (2010) *Great Lakes Fish Stocking Database* (US Fish and Wildlife Service Region 3 Fisheries Program and Great Lakes Fishery Commission, Ann Arbor, MI).
70. Crawford SS (2001) *Salmonine Introductions to the Laurentian Great Lakes: An Historical Overview and Evaluation of Ecological Effects* (NRC Research, Ottawa, Canada).
71. Dobiesz NE, et al. (2005) Ecology of the Lake Huron fish community, 1970–1999. *Can J Fish Aquat Sci* 62(6):1432–1451.
72. Stapanian MA, et al. (2008) Status of burbot populations in the Laurentian Great Lakes. *American Fisheries Society Symposium* 59:111–130.
73. National Oceanic and Atmospheric Administration Great Lakes Environmental Research Laboratory (NOAA-GLERL) (2012) *Great Lakes Aquatic Nonindigenous Species Information System* (GLANSIS, Ann Arbor, MI).
74. Ricciardi A (2006) Patterns of invasion in the Laurentian Great Lakes in relation to changes in vector activity. *Divers Distrib* 12(4):425–433.
75. Lodge DM, et al. (2006) Biological invasions: recommendations for U.S. policy and management. *Ecol Appl* 16(6):2035–2054.
76. Carlton JT (2008) The zebra mussel *Dreissena polymorpha* found in North America in 1986 and 1987. *J Great Lakes Res* 34(4):770–773.
77. Mills EL, et al. (1993) Colonization, ecology, and population-structure of the quagga mussel (*Bivalvia*, *Dreissenidae*) in the Lower Great-Lakes. *Can J Fish Aquat Sci* 50(11):2305–2314.
78. Higgins SN, Vander Zanden MJ (2010) What a difference a species makes: A meta-analysis of dreissenid mussel impacts on freshwater ecosystems. *Ecol Monogr* 80(2):179–196.
79. Fahnenstiel GL, Lang GA, Nalepa TF, Johengen TH (1995) Effects of zebra mussel (*Dreissena polymorpha*) colonization on water quality parameters in Saginaw Bay, Lake Huron. *J Great Lakes Res* 21(4):435–448.
80. Hecky RE, et al. (2004) The nearshore phosphorus shunt: A consequence of ecosystem engineering by dreissenids in the Laurentian Great Lakes. *Can J Fish Aquat Sci* 61(7):1285–1293.
81. Nicholls KH, Heintsch L, Carney E (2002) Univariate step-trend and Multivariate assessments of the apparent effects of P loading reductions and zebra mussels on the phytoplankton of the Bay of Quinte, Lake Ontario. *J Great Lakes Res* 28(1):15–31.
82. Higgins SN, et al. (2008) An ecological review of *Cladophora glomerata* (Chlorophyta) in the Laurentian Great Lakes. *J Phycol* 44(4):839–854.
83. Limburg KE, Luzadis VA, Ramsey M, Schulz KL, Mayer CM (2010) The good, the bad, and the algae: Perceiving ecosystem services and disservices generated by zebra and quagga mussels. *J Great Lakes Res* 36(1):86–92.
84. Bronte CR, et al. (2003) Fish community change in lake superior, 1970–2000. *Can J Fish Aquat Sci* 60(12):1552–1574.
85. Sullivan P, Adair R (2010) *Integrated Management of Sea Lampreys in the Great Lakes 2009: Annual Report to the Great Lakes Fishery Commission* (Great Lakes Fishery Commission, Ann Arbor, MI).
86. Mullett KM, et al. (2003) Estimating lake-wide abundance of spawning-phase sea lampreys (*Petromyzon marinus*) in the Great Lakes: Extrapolating from sampled streams using regression models. *J Great Lakes Res* 29:240–252.
87. Heinrich JW, Anderson WC, Oja SD (1985) Movement and capture of sea lampreys (*Petromyzon marinus*) marked in Lake Huron in 1981–82. *Technical Report 42* (Great Lakes Fishery Commission, Ann Arbor, MI).
88. Howe EA, Marsden JE, Bouffard W (2006) Movement of sea lamprey in the Lake Champlain basin. *J Great Lakes Res* 32(4):776–787.
89. Ricciardi A, MacIsaac HJ (2008) Evaluating the effectiveness of ballast water exchange policy in the Great Lakes. *Ecol Appl* 18(5):1321–1323, author reply 1323–1324.
90. Costello C, Drake JM, Lodge DM (2007) Evaluating an invasive species policy: Ballast water exchange in the Great Lakes. *Ecol Appl* 17(3):655–662.
91. Bailey SA, et al. (2011) Evaluating efficacy of an environmental policy to prevent biological invasions. *Environ Sci Technol* 45(7):2554–2561.
92. Rup MP, et al. (2010) Domestic ballast operations on the Great Lakes: Potential importance of Lakers as a vector for introduction and spread of nonindigenous species. *Can J Fish Aquat Sci* 67(2):256–268.
93. Briski E, et al. (2012) Relationship between propagule pressure in invasion ecology: A test with ships' ballast. *Proc Biol Sci* 279(1740):2990–2997.
94. Wells MG, Bailey SA, Ruddick B (2011) The dilution and dispersion of ballast water discharged into Goderich Harbor. *Mar Pollut Bull* 62(6):1288–1296.
95. Jude DJ, Reider RH, Smith GR (1992) Establishment of Gobiidae in the Great-Lakes basin. *Can J Fish Aquat Sci* 49(2):416–421.
96. Johnson TB, Allen M, Corkum LD, Lee VA (2005) Comparison of methods needed to estimate population size of round gobies (*Neogobius melanostomus*) in western Lake Erie. *J Great Lakes Res* 31(1):78–86.
97. Marsden JE, Jude DJ (1995) *Round Gobies Invade North America* (Ohio Sea Grant, Columbus, OH).
98. Janssen J, Jude DJ (2001) Recruitment failure of mottled sculpin *Cottus bairdi* in Calumet Harbor, southern Lake Michigan, induced by the newly introduced round goby *Neogobius melanostomus*. *J Great Lakes Res* 27(3):319–328.
99. Corkum LD, Sapota MR, Skora KE (2004) The round goby, *Neogobius melanostomus*, a fish invader on both sides of the Atlantic Ocean. *Biol Invasions* 6(2):173–181.
100. Johnson TB, Bunnell DB, Knight CT (2005) A potential new energy pathway in central Lake Erie: The round goby connection. *J Great Lakes Res* 31(Suppl 2):238–251.
101. Meyerson LA, Saltonstall K, Windham L, Kiviat E, Findlay S (2000) A comparison of *Phragmites australis* in freshwater and brackish marsh environments in North America. *Wetlands Ecol Manage* 8:89–103.
102. Wilcox KL, Petrie SA, Maynard LA, Meyer SW (2003) Historical distribution and abundance of *Phragmites australis* at Long Point, Lake Erie, Ontario. *J Great Lakes Res* 29(4):664–680.
103. Bolton RM, Brooks RJ (2010) Impact of the seasonal invasion of *Phragmites australis* (common reed) on turtle reproductive success. *Chelonian Conserv Biol* 9(2):238–243.
104. LeBlanc MC, de Blois S, Lavoie C (2010) The invasion of a large lake by the Eurasian genotype of common reed: The influence of roads and residential construction. *J Great Lakes Res* 36(3):554–560.
105. Saltonstall K (2002) Cryptic invasion by a non-native genotype of the common reed, *Phragmites australis*, into North America. *Proc Natl Acad Sci USA* 99(4):2445–2449.
106. Bourgeau-Chavez LL, et al. (2012) Mapping invasive *Phragmites australis* in the coastal Great Lakes with ALOS PALSAR satellite imagery for decision support. *J Great Lakes Res*, in press.
107. Ontario Natural Heritage Information Centre (2011) *Phragmites: Georeferenced Point Locations*. (Ontario Ministry of Natural Resources, Peterborough, Canada).
108. Global Biodiversity Information Facility GBIF Data Portal. Available at <http://data.gbif.org>. Accessed February 21, 2011. (GBIF biodiversity occurrence data provided by Acadia University, University of Alberta, Canadian Museum of Nature, Agriculture and Agri-Food Canada (C.E.F. Ottawa), Eastern Ontario Biodiversity Museum, Manitoba Museum of Man and Nature, Université de Montréal, McGill University, Nova Scotia Museum, Université Laval, Ministère des Ressources Naturelles, University of Saskatchewan, University of Toronto, University of British Columbia, University of New Brunswick, University of Prince Edward Island, University of Western Ontario, Royal British Columbia Museum, University of Waterloo, University of Manitoba.).
109. Fer T, Hroudova Z (2009) Genetic diversity and dispersal of *Phragmites australis* in a small river system. *Aquat Bot* 90(2):165–171.
110. Stone M, Saunderson HC (1996) Regional patterns of sediment yield in the Laurentian Great Lakes basin. *Int Assoc Hydrol Sci Publishers* 126:125–131.
111. Robertson DM (1997) Regionalized loads of sediment and phosphorus to Lakes Michigan and Superior—High flow and long-term average. *J Great Lakes Res* 23(4):416–439.

112. Robertson DM, Saad DA, Heisey DM (2006) *Present and Reference Concentrations and Yields of Suspended Sediment in Streams in the Great Lakes Region and Adjacent Areas* (US Geological Survey, Washington, DC).
113. Ludsin SA, Pangle KL, Tyson JT (2010) *Using Satellite Imagery for Fisheries Management. Lake Erie Protection Fund Project 365-09, Final Report*. Available at <http://lakeerie.ohio.gov/Portals/0/Closed%20Grants/small%20grants/SG%20365-09%20Final%20Report.pdf>. Accessed March 2011.
114. Dolan DM, Chapra SC (2012) Great Lakes total phosphorus revisited: 1. Loading analysis and update (1994–2008). *J Great Lakes Res* 38(4):730–740.
115. Han H, Allan JD (2011) Uneven rise in N inputs to the Lake Michigan Basin over the 20th century corresponds to agricultural and societal transitions. *Biogeochemistry* 109(1–3):175–187.
116. Winter JG, et al. (2002) Total phosphorus budgets and nitrogen loads: Lake Simcoe, Ontario (1990 to 1998). *J Great Lakes Res* 28(3):301–314.
117. McDonald CP, Urban NR, Casey CM (2010) Modeling historical trends in Lake Superior total nitrogen concentrations. *J Great Lakes Res* 36(4):715–721.
118. Han H, Bosch N, Allan JD (2011) Spatial and temporal variation in phosphorus budgets for 24 watersheds in the Lake Erie and Lake Michigan basins. *Biogeochemistry* 102(1–3):45–58.
119. Schwab DJ, Beletsky D, DePinto J, Dolan DM (2009) A hydrodynamic approach to modeling phosphorus distribution in Lake Erie. *J Great Lakes Res* 35(1):50–60.
120. Neilson MA, Stevens RJJ (1987) Spatial heterogeneity of nutrients and organic-matter in Lake-Ontario. *Can J Fish Aquat Sci* 44(12):2192–2203.
121. U.S. Environmental Protection Agency (2001) *Report to Congress: Implementation and Enforcement of the Combined Sewer Overflow Policy* (US EPA, Washington, DC).
122. MacDonald E, Podolsky L (2009) *Flushing out the Truth. Sewage Dumping in Ontario* (Ecojustice, Toronto, Canada).
123. Howell ET, Chomiccki KM, Kaltenecker G (2012) Patterns in water quality on Canadian shores of Lake Ontario: Correspondence with proximity to land and level of urbanization. *J Great Lakes Res* 38(suppl 4):32–46.
124. Evers DC, et al. (2011) Mercury in the Great Lakes region: Bioaccumulation, spatiotemporal patterns, ecological risks, and policy. *Ecotoxicology* 20(7):1487–1499.
125. Mohapatra SP, Nikolova I, Mitchell A (2007) Managing mercury in the great lakes: An analytical review of abatement policies. *J Environ Manage* 83(1):80–92.
126. Turyk ME, et al. (2012) Risks and benefits of consumption of Great Lakes fish. *Environ Health Perspect* 120(1):11–18.
127. Marvin C, Painter S, Rossmann R (2004) Spatial and temporal patterns in mercury contamination in sediments of the Laurentian Great Lakes. *Environ Res* 95(3):351–362.
128. Brix KV, DeForest DK, Adams WJ (2011) The sensitivity of aquatic insects to divalent metals: A comparative analysis of laboratory and field data. *Sci Total Environ* 409(20):4187–4197.
129. Marvin C, et al. (2004) Spatial and temporal trends in surface water and sediment contamination in the Laurentian Great Lakes. *Environ Pollut* 129(1):131–144.
130. Henny CJ, Grove RA, Kaiser JL, Johnson BL (2010) North American osprey populations and contaminants: historic and contemporary perspectives. *J Toxicol Environ Health B Crit Rev* 13(7–8):579–603.
131. Ontario Ministry of Natural Resources (OMNR) (2012) *The 2011–2012 Guide to Eating Ontario Sport Fish*. Available at [www.ontario.ca/fishguide](http://www.ontario.ca/fishguide). Accessed January 2012.
132. International Joint Commission (1978) Great Lakes Water Quality Agreement, Article II. Available at <http://www.ijc.org/re/agree/quality.html>. Accessed March 2012.
133. Wenning RJ, Batley GE, Ingersoll CG, Moore DW, eds (2005) *Use of Sediment Quality Guidelines and Related Tools for the Assessment of Contaminated Sediments* (Society of Environmental Toxicology and Chemistry Press, Pensacola, FL).
134. Krantzberg G, de Boer C (2008) A valuation of ecological services in the Laurentian Great Lakes Basin with an emphasis on Canada. *J Am Water Works Assoc* 100(6):100–111.
135. Shaikh S, Tolley G (2004) *Assessing the Benefits of Reducing Chicago-Area Beach Closure Days* (The Joyce Foundation Environmental Program, Chicago, IL).
136. US Fish and Wildlife Service (2006) *Birding the United States: A Demographic and Economic Analysis—Addendum to the 2006 National Survey of Fishing, Hunting, and Wildlife Associated Recreation*. (US Fish and Wildlife Service, Washington, DC).
137. US Fish and Wildlife Service; US Census Bureau (2006) *National Survey of Fishing, Hunting, and Wildlife Associated Recreation*. (US Department of the Interior and US Department of Commerce, Washington, DC).
138. Fisheries and Oceans Canada (2008) *Survey of Recreational Fishing in Canada: Selected Results for the Great Lakes Fishery 2005* (DFO Economic Analysis and Statistics Policy Sector, Ottawa, Canada), p 64.
139. O'Keefe DM, Miller SR (2011) *2009 Charter Fishing Study* (Michigan Sea Grant, Michigan).
140. Goodyear CS, Edsall TA, Ormsby Dempsey DM, Moss GD, Polanski PE (1982) *Atlas of the Spawning and Nursery Areas of Great Lakes Fishes* (US Fish and Wildlife Service, Washington, DC).
141. Marsden JE, et al. (1995) Lake trout spawning habitat in the Great Lakes—A review of current knowledge. *J Great Lakes Res* 21(Suppl 1):487–497.
142. Wei A, Chow-Fraser P, Albert D (2004) Influence of shoreline features on fish distribution in the Laurentian Great Lakes. *Can J Fish Aquat Sci* 61(7):1113–1123.
143. R Development Core Team (2010) *R: A Language and Environment for Statistical Computing* (R Foundation for Statistical Computing, Vienna, Austria).
144. McGargial K, Cushman S, Stafford S (2000) *Multivariate Statistics for Wildlife and Ecology Research* (Springer, New York, NY).
145. Hawley N, et al. (2006) Lake Erie hypoxia prompts Canada-US study. *EOS* 87(32):313–324.
146. Nalepa TF, et al. (2008) *Abundance of the Amphipod Diporeia and the Mussels Dreissena polymorpha and Dreissena rostriformis bugensis in Lake Michigan in 1994–1995, 2000, and 2005*. (National Oceanic and Atmospheric Administration Great Lakes Environmental Research Laboratory, Ann Arbor, MI), p 25.
147. Nalepa TF, et al. (2007) *Abundance and Distribution of Benthic Macroinvertebrate Populations in Lake Huron in 1972 and 2000–2003*. (National Oceanic and Atmospheric Administration Great Lakes Environmental Research Laboratory, Ann Arbor, MI).
148. Watkins J, et al. (2007) Evidence for remote effects of dreissenid mussels on the amphipod *Diporeia*: Analysis of Lake Ontario benthic surveys, 1972–2003. *J Great Lakes Res* 33(3):642–657.
149. Kornis MS, Mercado-Silva N, Vander Zanden MJ (2012) Twenty years of invasion: A review of round goby *Neogobius melanostomus* biology, spread and ecological implications. *J Fish Biol* 80(2):235–285.
150. Corson LA, Fisher SA (2009) *Manual of Best Management Practices for Port Operations and Model Environmental Management System* (Great Lakes Maritime Research Institute, West Lafayette, IN).
151. Verhoughstraete MP, Byappanahalli MN, Rose JB, Whitman RL (2010) Cladophora in the Great Lakes: Impacts on beach water quality and human health. *Water Sci Technol* 62(1):68–76.
152. US Environmental Protection Agency (2004) *Report to Congress: Impacts and Control of CSOs and SSOs* (US EPA, Washington, DC).
153. Erdner DL, et al. (2008) Centers for Oceans and Human Health: A unified approach to the challenge of harmful algal blooms *Environ Health* 7(Suppl 2):S2. Available at <http://www.ehjournal.net/content/7/S2/S2>.
154. Davis TW, et al. (2010) Effects of nitrogenous compounds and phosphorus on the growth of toxic and non-toxic strains of *Microcystis* during cyanobacterial blooms. *Aquat Microb Ecol* 61(2):149–162.
155. Jones J, Francis CM (2003) The effects of light characteristics on avian mortality at lighthouses. *J Avian Biol* 34(4):328–333.
156. Ogden LJE (1996) *Collision Course: The Hazards of Lighted Structures and Windows to Migrating Birds* (World Wildlife Fund Canada, Fatal Light Awareness Program, Toronto, Canada).
157. Longcore T, Rich C (2004) Ecological light pollution. *Front Ecol Environ* 2(4):191–198.
158. Gehring J, Kerlinger P, Manville AM, 2nd (2009) Communication towers, lights, and birds: Successful methods of reducing the frequency of avian collisions. *Ecol Appl* 19(2):505–514.
159. Bonter DN, Gauthreaux SA, Jr., Donovan TM (2009) Characteristics of important stopover locations for migrating birds: Remote sensing with radar in the Great Lakes basin. *Conserv Biol* 23(2):440–448.
160. Ewert DN, Hamas MJ, Smith RJ, Dallman ME, Jorgensen SW (2011) Distribution of migratory landbirds along the northern Lake Huron shoreline. *Wilson J Ornithol* 123(3):536–547.
161. Roberts JJ, et al. (2009) Effects of hypolimnetic hypoxia on foraging and distributions of Lake Erie yellow perch. *J Exp Mar Biol Ecol* 381(Suppl):S132–S142.
162. Barbiero RP, Tuchman ML (2004) Changes in the crustacean communities of Lakes Michigan, Huron, and Erie following the invasion of the predatory cladoceran *Bythotrephes longimanus*. *Can J Fish Aquat Sci* 61(11):2111–2125.
163. Barnhisel DR, Kerfoot WC (2004) Fitting into food webs: Behavioral and functional response of young lake trout (*Salvelinus namaycush*) to an introduced prey, the spiny cladoceran (*Bythotrephes cederstroemi*). *J Great Lakes Res* 30(Suppl 1):300–314.
164. Schelske CL, Stoermer EF (1971) Eutrophication, silica depletion, and predicted changes in algal quality in Lake Michigan. *Science* 173(3995):423–424.
165. Smith VH (1983) Low nitrogen to phosphorus ratios favor dominance by blue-green algae in lake phytoplankton. *Science* 221(4611):669–671.
166. Marsden JE, et al. (1995) Lake trout spawning habitat in the Great Lakes—a review of current knowledge. *J Great Lakes Res* 21(Suppl 1):487–497.
167. Marsden JE, Chotkowski MA (2001) Lake trout spawning on artificial reefs and the effect of zebra mussels: Fatal attraction? *J Great Lakes Res* 27(1):33–43.
168. Eshenroder RL, Peck JW, Olver CH (1999) *Research Priorities for Lake Trout Rehabilitation in the Great Lakes: A 15-Year Perspective* (Great Lakes Fishery Commission, Ann Arbor, MI).
169. Fitzsimons J, et al. (2006) Laboratory estimates of salmonine egg predation by round goby (*Neogobius melanostomus*), sculpins (*Cottus cognatus* and *C. bairdi*), and crayfish (*Orconectes propinquus*). *J Great Lakes Res* 32(2):227–241.
170. Roseman EF, Taylor WW, Hayes DB, Jones AL, Francis JT (2006) Predation on walleye eggs by fish on reefs in western Lake Erie. *J Great Lakes Res* 32(3):415–423.

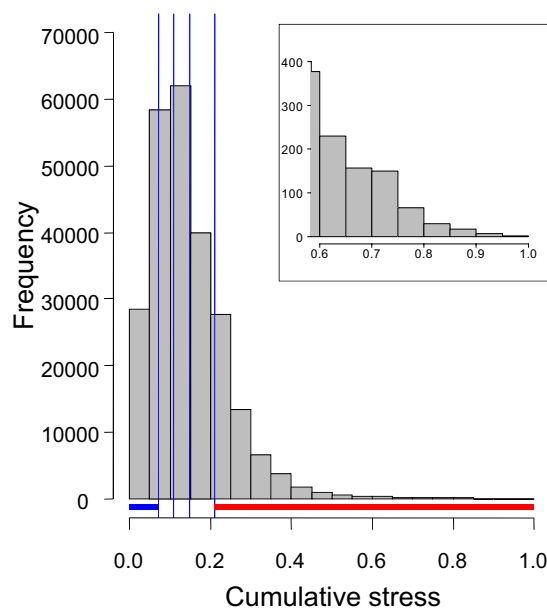

**Fig. S1.** Histogram of CS in the Laurentian Great Lakes. Frequencies are the area (in square kilometers) in each bin ( $n = 243,937$  pixels). (Inset) Expanded view of tail values. Quintile breaks in CS (drawn with vertical lines) are: 0% = 0, 20% = 0.07, 40% = 0.11, 60% = 0.15, 80% = 0.21, 100% = 1. We highlight the lowest quintile in dark blue and the highest quintile in red, which correspond to the dark blue and red regions in Fig. 1.

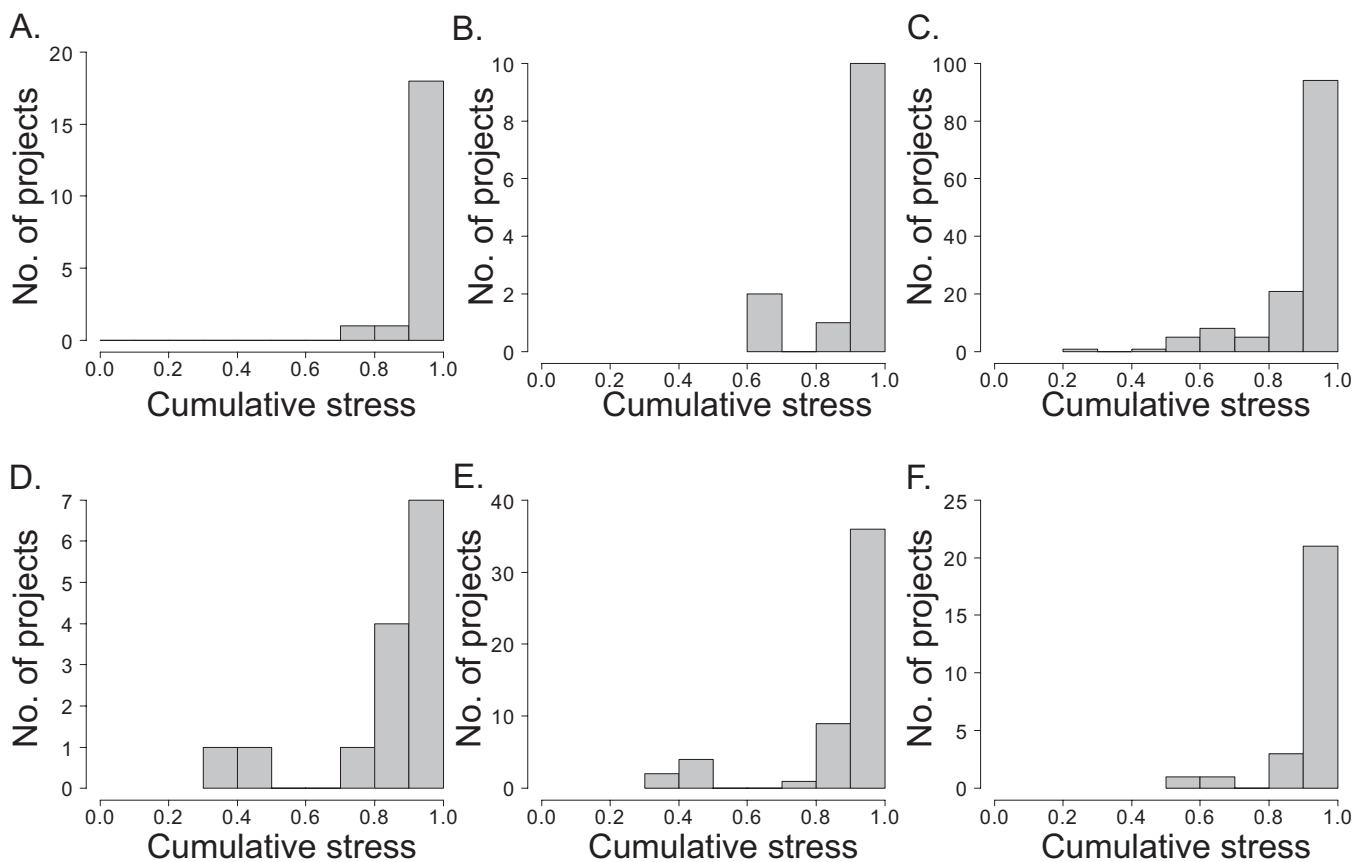

**Fig. S2.** Current restoration activities in the Laurentian Great Lakes are located primarily in areas of high CS. Histograms of CS at AOCs, separated by location type (A and B), and restoration projects funded through the US Great Lakes Restoration Initiative (GLRI), separated by focus area (C–F). (A) AOCs located in river mouths and connecting channels ( $n = 20$ ); (B) AOCs located directly in the lake waters ( $n = 13$ ); (C) GLRI projects focused on restoring wetlands and other habitats ( $n = 135$ ); (D) GLRI projects focused on combating invasive species ( $n = 14$ ); (E) GLRI projects focused on promoting nearshore health ( $n = 52$ ); and (F) GLRI projects focused on cleaning up toxics ( $n = 26$ ).

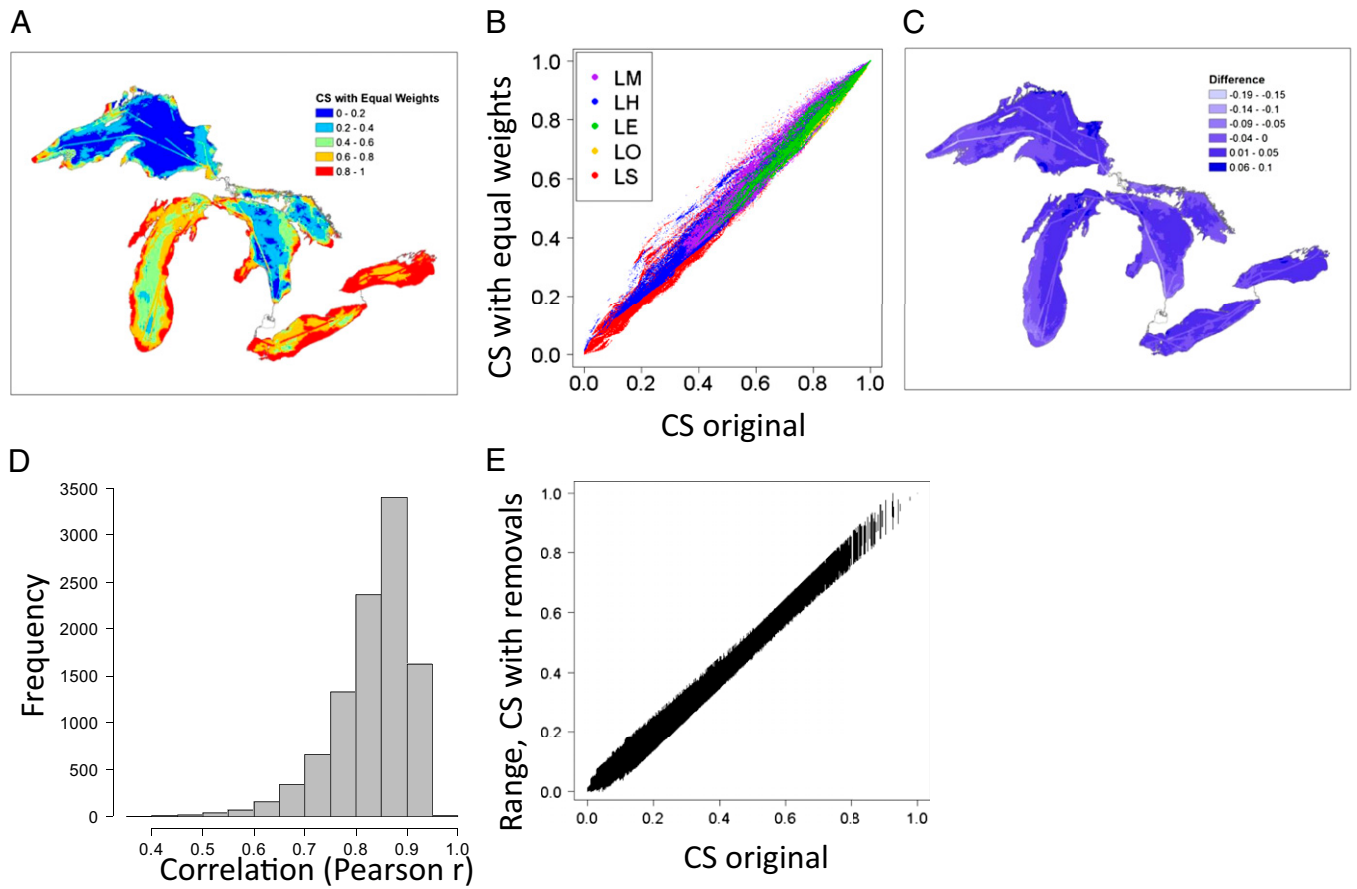

**Fig. S3.** Sensitivity analyses. (A) CS recalculated with the null expectation of equal weightings for every stressor (shown with  $\ln[x + 1]$ -CDF transformation). (B) Plot of CS calculated with equal weightings vs. CS calculated with expert weightings mapped in Fig. 1, with each point representing one pixel in the Great Lakes ( $n = 243,937$  pixels). Points are colored by lake (LM, Lake Michigan; LH, Lake Huron; LE, Lake Erie; LO, Lake Ontario; LS, Lake Superior). (C) Difference between CS using equal weightings and the original CS calculated with expert weightings. (D) Histogram of Pearson correlation coefficients from 10,000 permutations of the weightings; for each permutation, we randomly assigned the weights for each stressor (mixing up the expert weightings), recalculated the CS map, and then calculated its correlation with the original CS map. (E) Results after removing individual stressors and recalculating CS: each vertical line represents one pixel in the Great Lakes ( $n = 243,937$  pixels), showing the range (line segments drawn between maximum and minimum) of values computed when removing each of the 34 stressors one at a time.

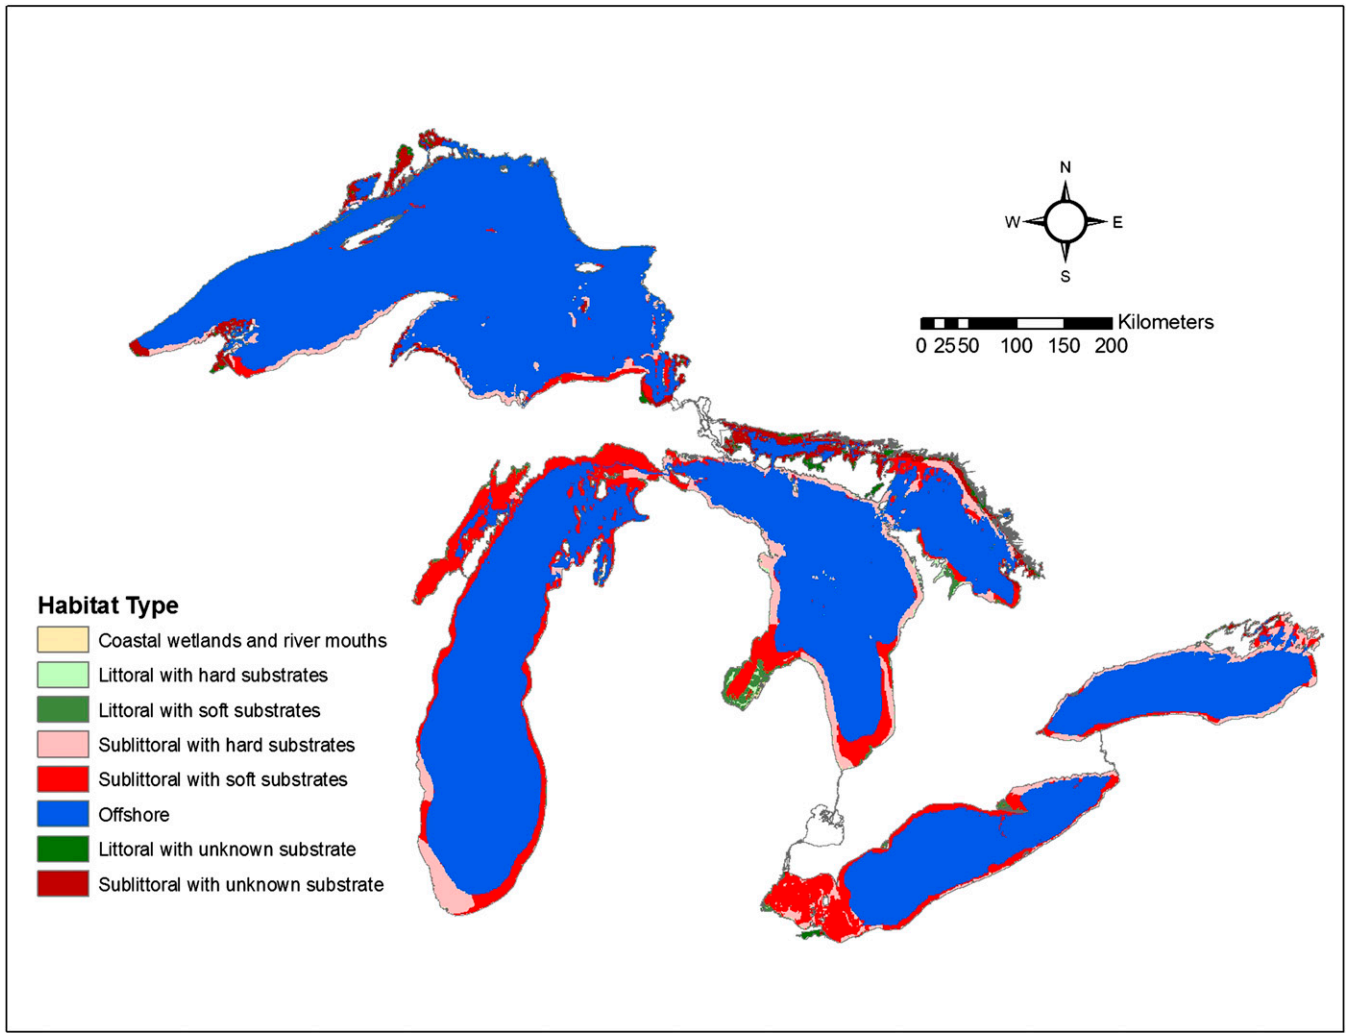

Fig. S4. The habitat classification for the Laurentian Great Lakes used for modeling cumulative stress.



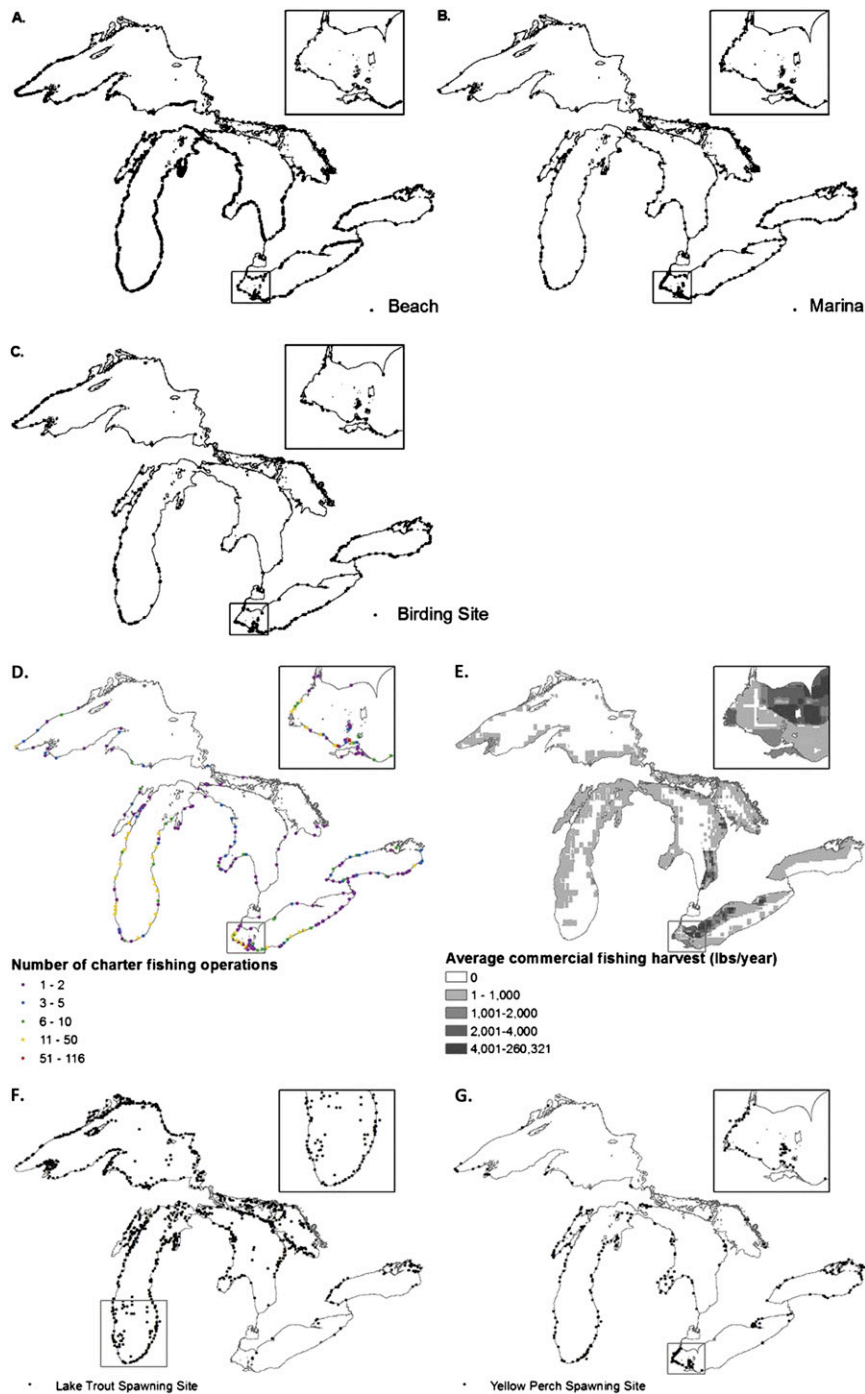

**Fig. S5.** Locations of ecosystem services. Some highly valued locations for recreational activities in the Laurentian Great Lakes include (A) beach locations, (B) marina locations, and (C) birding sites. Fisheries-related ecosystem services include two food provisioning services, charter and commercial fishing (D–E), and the locations supporting the spawning of two fish species caught in the Laurentian Great Lakes (F and G). Shown are (D) home ports of charter fishing operations, with colors depicting the number of boats operating out of each home port; (E) locations of commercial fishing harvest; (F) historic and current lake trout spawning locations; (G) historic and current yellow perch spawning locations.

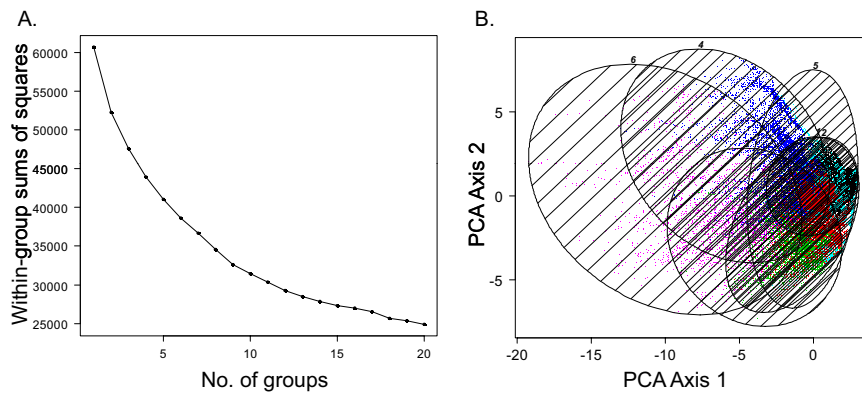

**Fig. S6.** Results from *K*-means cluster analysis of stressor intensities in high stress ( $CS > 0.8$ ) areas of the Laurentian Great Lakes. (A) Modified scree plot showing the decrease in the within-group sums of squares with each addition of another cluster. (B) Example six-cluster result, summarized using PCA (29.7% of variation in stressor intensities explained): ellipses (numbered) represent each cluster in PCA space, and the sites (points) are colored by cluster. Note that PCA settings here are defaults from `clusplot()` in R, and they differ from the PCA biplot presented in Fig. 3C.

## Other Supporting Information Files

[Table S1 \(DOC\)](#)

[Table S2 \(DOCX\)](#)

[Table S3 \(DOCX\)](#)
